# Supplementary material for: Identification of TYROBP and C1QB as Two Novel Key Genes With Prognostic Value in Gastric Cancer by Network Analysis
Source: PubMed Central journal article supplement (PMC7516284; doi:10.3389/fonc.2020.01765), 2020-09-11
Supplement: Image_5.pdf [file Image_5.pdf]

**A**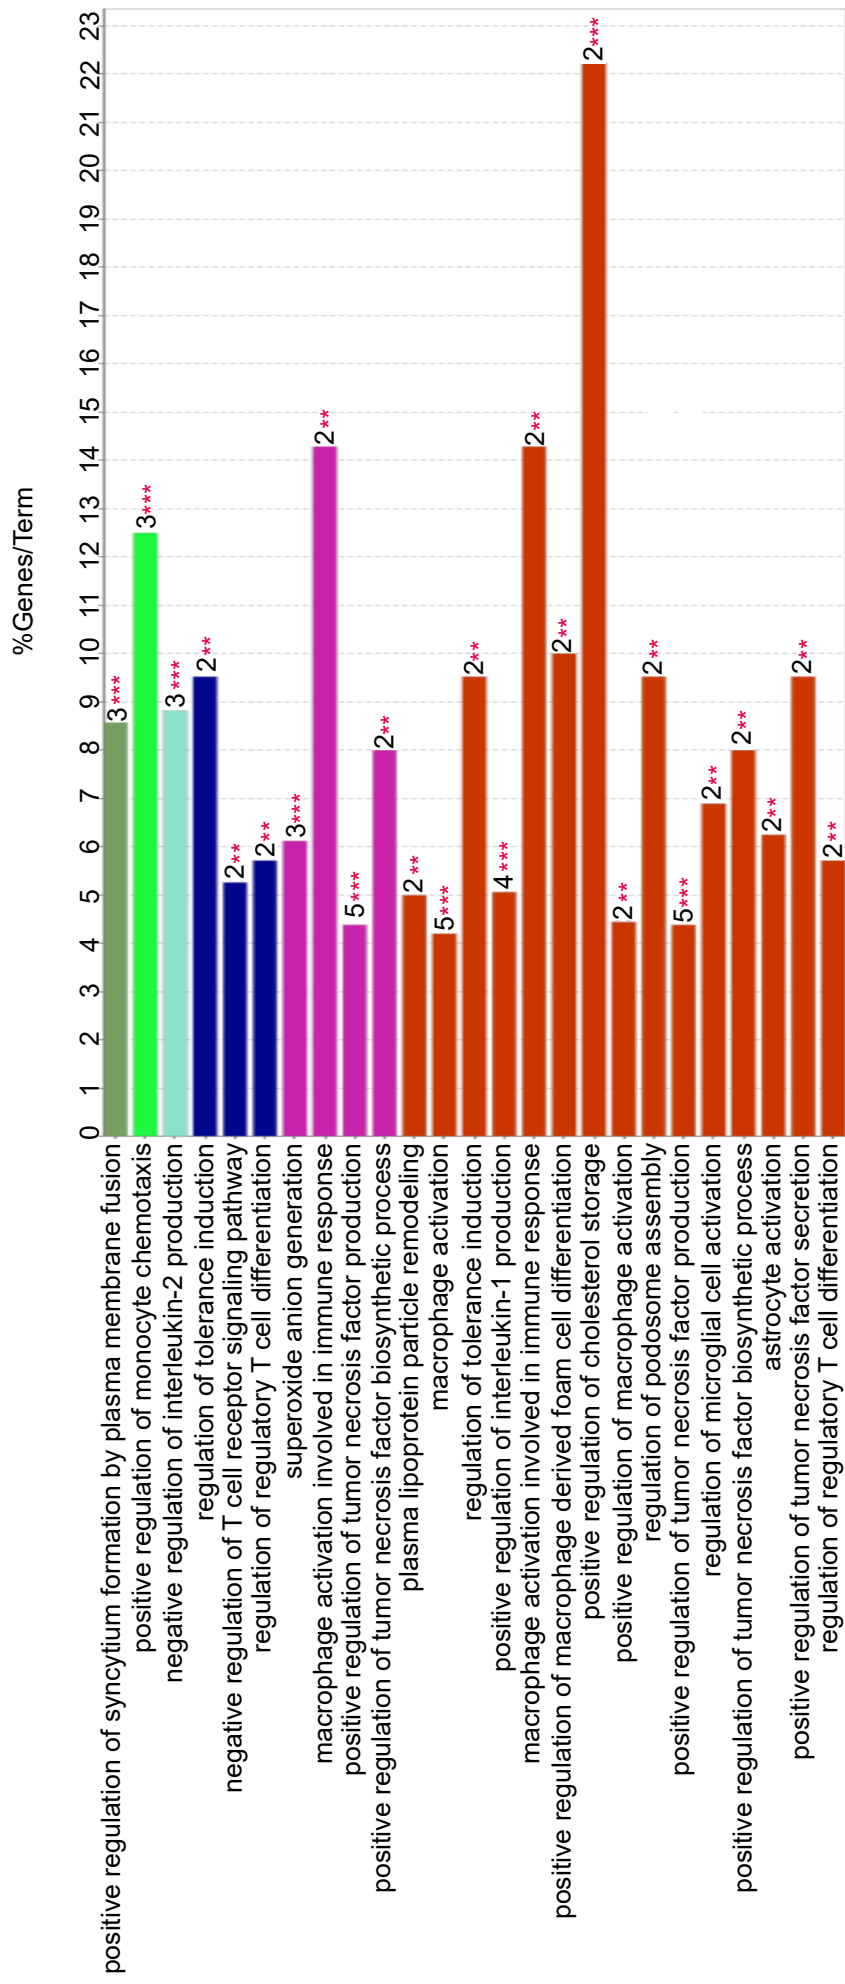**B**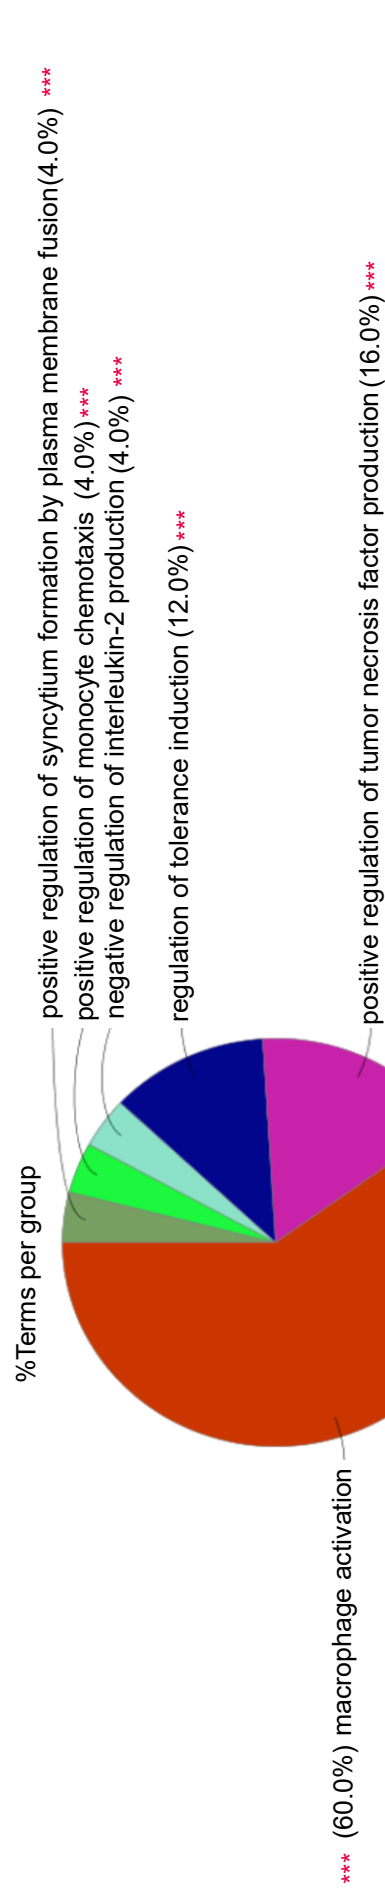

**Supplementary Figure 5** | Numbers of genes and terms enriched in the identified pathways of hub genes from WGCNA network. **(A)** Numbers of genes enriched in the identified pathways. **(B)** Numbers of terms enriched in the identified pathways.
