# Supplementary material for: Identification of TYROBP and C1QB as Two Novel Key Genes With Prognostic Value in Gastric Cancer by Network Analysis
Source: PubMed Central journal article supplement (PMC7516284; doi:10.3389/fonc.2020.01765), 2020-09-11
Supplement: Image_9.pdf [file Image_9.pdf]

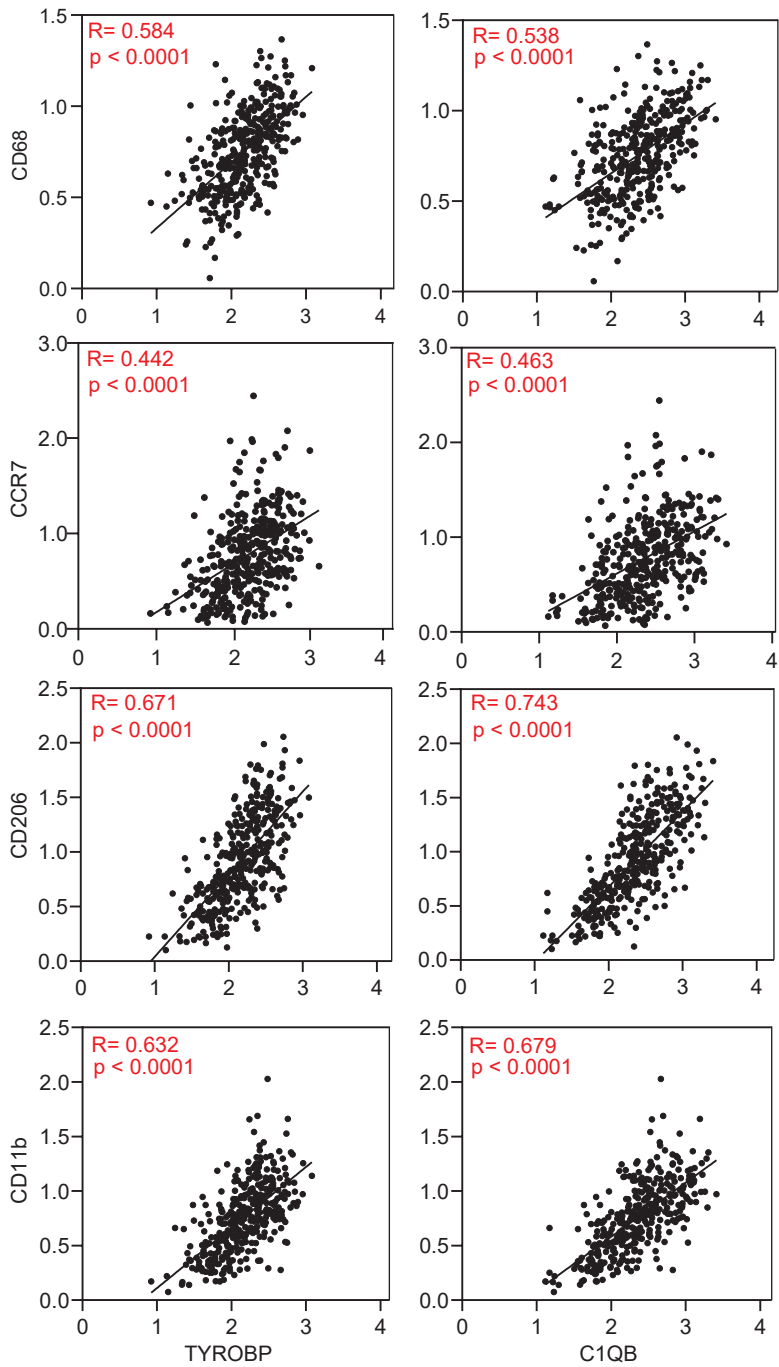

**Supplementary Figure 9** | Correlation analysis of TYROBP and C1QB with differential markers of macrophage. CD68, a marker of M0; CCR7, a marker of M1; CD206 and CD11b, markers of M2.
