# Supplementary material for: Identification of TYROBP and C1QB as Two Novel Key Genes With Prognostic Value in Gastric Cancer by Network Analysis
Source: Front Oncol. 2020 Sep 11;10:1765. doi: 10.3389/fonc.2020.01765 (PMC7516284; doi:10.3389/fonc.2020.01765)
Supplement: Supplementary file 1 [file Data_Sheet_1.pdf]

## Supplementary Table

**Table S1** 333 up-regulated and 93 down-regulated genes were identified from TCGA-STAD, GSE65801, GSE54129 and GSE118916

| DEGs                | Gene Name                                                                                                                                                                                                                                                                                                                                                                                                                                                                                                                                                                                                                                                                                                                                                                                                                                                                                                                                                                                                                                                                                                                                                                                                                                                                                                                                                                                                                                                                                                                                                                                                                                                                                                                                                                                                                                                                                                                                                                                                                                                                                                                                                                                                                                                                                                                                                                                                                                                                                                   |
|---------------------|-------------------------------------------------------------------------------------------------------------------------------------------------------------------------------------------------------------------------------------------------------------------------------------------------------------------------------------------------------------------------------------------------------------------------------------------------------------------------------------------------------------------------------------------------------------------------------------------------------------------------------------------------------------------------------------------------------------------------------------------------------------------------------------------------------------------------------------------------------------------------------------------------------------------------------------------------------------------------------------------------------------------------------------------------------------------------------------------------------------------------------------------------------------------------------------------------------------------------------------------------------------------------------------------------------------------------------------------------------------------------------------------------------------------------------------------------------------------------------------------------------------------------------------------------------------------------------------------------------------------------------------------------------------------------------------------------------------------------------------------------------------------------------------------------------------------------------------------------------------------------------------------------------------------------------------------------------------------------------------------------------------------------------------------------------------------------------------------------------------------------------------------------------------------------------------------------------------------------------------------------------------------------------------------------------------------------------------------------------------------------------------------------------------------------------------------------------------------------------------------------------------|
| Up -<br>regulated   | <p><i>CXCR4, MMP7, CDC25B, SLCO2B1, COL1A1, CST7, SELL, PLEKHG4, FNDC1, SAMSNICOL18A1, FUS, ASS1, CD53, TFEC, BICD1, DUSP10, CRI, FPR1, ARHGDIB, F2RL2, LRRC32, ALOX5AP, SH3PXD2B, ITGBL1, CPXM1, LRP8, COMP, WISP1, SLC15A3, ADORA2B, SLFN11, ADAP2, SULF1, SLC39A10, RARRES1, IGSF6, COL11A1, TREM1, GBP5, SERPINA3, C1QC, SH3RF3, GPNMB, CD55, FZD2, TNFRSF11B, IGFBP7, LTBP2, MAP3K8, HLA_DMB, EGFLAM, IER5L, TNFRSF12A, DFNA5, PDPN, COL3A1, PECAM1, IFITM3, CCR1, SERPINE2, NOD1, CCL8, GPR34, SLC20A1, AEBP1, PCDHB16, CXCL1, FAM43A, HSPH1, SIGLEC7, FJX1, PHTF2, SLC7A6, IGF1, PRR16, SERPINB9, LAIR1, C3, PIK3AP1, DLGAP4, FN1, IFI16, RASSF4, CTSB, ATP8B4, SPP1, CTSK, LST1, CDK4, MXRA5, RASGEF1A, GXYLT2, RGS1, PLXND1, PTPRC, SDS, CNN2, COL4A2, LUM, HHEX, THBS4, FSCN1, SRPX2, CLEC7A, CYBB, NID2, PDE4B, LCP2, GLS, EMILIN2, LOX, IL32, LCP1, CLDN1, FCER1, ELK3, IFITM1, HAVCR2, TMEM176B, MCTP1, DPYSL2, FPR3, NRP1, PLEK, TMEM45A, PLA2G2A, PLXNC1, MNDA, CPNE2, SLC19A3, MYOF, PCDHB2, NOX4, SFRP4, GRB14, CCDC8, ENG, TYROBP, TMEM158, DAB2, SERPINH1, IL2RA, FAP, TNFSF4, INHBA, CALU, TNFSF13B, TMEM173, MDK, CALCRL, ICAM1, THBS2, ETS1, SERPINE1, LY6E, CSF2RA, COL10A1, BCAT1, TGFB1, C5AR1, APOE, TUBB, TM6SF1, CMTM3, OSR2, SFRP2, TNFAIP6, KIAA0226L, ADCY3, SLA, CPVL, PII5, CD83, SULF2, CD93, PODXL, CDH11, BGN, COCH, TNFAIP3, ASPN, CCL18, TREM2, THSD7A, CXCL2, CHRDL2, HOXC10, MCM2, CETP, CXCL10, VCAN, AJUBA, FPR2, COL1A2, C1orf162, COL12A1, ESM1, RCN3, TRIO, CHSY1, PTPN12, MXRA8, FAS, OSMR, CCT2, SLCO3A1, NCF2, CST1, SNX10, CLDN7, MS4A6A, IFITM2, GJA4, FKBP10, DDAH2, C10orf10, GREM1, BUB1, CD163, GPR65, BST2, FAM198B, HOXC9, FADS3, TNFRSF10B, HIF1A, C1QB, S100A10, TLR4, GLIPR1, COL6A3, PLEKHA4, CLEC4A, TDO2, SPARC, COL5A1, CTHRC1, PLXDC1, E2F3, FGD6, TPX2, LILRB2, IGF2BP3, ANP32E, LAMP3, P4HA3, FYB, MAPRE1, KDELC1, CHI3L1, LOXL1, PRRX1, HCK, ASAP1, COL5A2, THY1, TMEM176A, CD200, MSR1, TIMP1, MRC1, NNMT, BCL2A1, ECT2, CD14, TRIP6, CDH3, PGF, WNT2, CSGALNACT1, GBP1, C2, ARPC1B, PLA2G7, MFAP2, COL16A1, GPX8, PCDH17, COL4A1, ALDH1A3, ENTPD1, CPNE1, HAPLN3, CTSA, TLR2, AMIGO2, MYO1B, PLAUI, CDH13, RNASE6, TGM2, RFTN1, COL15A1, LILRB4, FOXC1, ABCA1, ADAMTS9, RAI14, HOXB3, APLNR, IL13RA2, HLA_DPA1, LTBI, FMO1, FBN1, INHBB, S100A11, ANGPT2, CPNE8, ST3GAL2, SACS, S100A4, EPB41L2, PLXDC2, HOMER1, CXCL9, MARCH1, OLFML2B, VCAM1, PPFIA1, LAPTM5, FSTL3, PMEPA1, HOXC6, HES4, NPL, CP, VAV1, MMP9, SLC39A6, CTSC</i></p> |
| Down -<br>regulated | <p><i>MAOA, PMM1, GKN1, ACADL, ENHO, NRG4, KLF4, MICALL1, TNFRSF17, CYP4F12, SCNN1B, ZBTB7C, GGT6, UBE2QL1, MT1E, ANXA10, GIF, NME5, GDDPD2, SOSTDC1, FAM46C, SH3GL2, CKMT2, KCNJ16, GKN2, AKR1B10,</i></p>                                                                                                                                                                                                                                                                                                                                                                                                                                                                                                                                                                                                                                                                                                                                                                                                                                                                                                                                                                                                                                                                                                                                                                                                                                                                                                                                                                                                                                                                                                                                                                                                                                                                                                                                                                                                                                                                                                                                                                                                                                                                                                                                                                                                                                                                                                 |

---

*PTPRZ1, ATP4A, UGT2B15, MAL, ESRRG, AMPD1, TFF2, MT1X, SPINK2, LIPF, CAPN13, CYP2C18, FUT9, C16orf89, PGC, AKR1C3, SELENBP1, CBR1, NTPD3, AKR7A3, FAM3B, ADH1C, PLCXD3, CWH43, GPT, CXCL17, NR3C2, KRT20, RNASE1, MYZAP, AKR1C1, VSIG2, SCNN1G, PSAPL1, PSCA, SPTSSB, TFF1, DERL3, LDHD, FBP2, AADAC, FAM150B, SCIN, CAPN9, VILL, ADH7, CCKBR, ADRB2, HPGD, SCGB2A1, GUCA2B, ETFDH, LIFR, ALDH3A1, RDH12, CA2, LTF, GSTA3, MFSD4, SSTR1, PAIP2B, KCNE2, SIGLEC11, ALDOB, TM6SF2, KCNJ15, SULT1B1*

---

**Table S2** GO term enrichment analysis of hub modules from PPI network in gastric cancer

|          | Category | Term                                                   | Count | -log10(PValue) |
|----------|----------|--------------------------------------------------------|-------|----------------|
| Module 1 | BP       | GO:0030198~extracellular matrix organization           | 21    | 29.64          |
|          | BP       | GO:0030574~collagen catabolic process                  | 13    | 20.61          |
|          | BP       | GO:0030199~collagen fibril organization                | 10    | 16.31          |
|          | BP       | GO:0007155~cell adhesion                               | 12    | 8.88           |
|          | BP       | GO:0050900~leukocyte migration                         | 8     | 8.29           |
|          | CC       | GO:0031012~extracellular matrix                        | 19    | 22.89          |
|          | CC       | GO:0005788~endoplasmic reticulum lumen                 | 16    | 20.47          |
|          | CC       | GO:0005581~collagen trimer                             | 13    | 19.01          |
|          | CC       | GO:0005576~extracellular region                        | 26    | 18.55          |
|          | CC       | GO:0005578~proteinaceous extracellular matrix          | 16    | 18.27          |
|          | MF       | GO:0005201~extracellular matrix structural constituent | 12    | 18.20          |
|          | MF       | GO:0048407~platelet-derived growth factor binding      | 5     | 8.30           |
|          | MF       | GO:0005518~collagen binding                            | 6     | 6.84           |
|          | MF       | GO:0005178~integrin binding                            | 6     | 5.63           |
|          | MF       | GO:0050840~extracellular matrix binding                | 4     | 4.69           |
| Module 2 | BP       | GO:0006955~immune response                             | 9     | 5.62           |
|          | BP       | GO:0007165~signal transduction                         | 13    | 5.53           |
|          | BP       | GO:0006968~cellular defense response                   | 4     | 3.50           |
|          | BP       | GO:0001666~response to hypoxia                         | 5     | 3.31           |
|          | BP       | GO:0022617~extracellular matrix disassembly            | 4     | 3.24           |
|          | CC       | GO:0005615~extracellular space                         | 17    | 8.68           |
|          | CC       | GO:0009986~cell surface                                | 11    | 7.07           |
|          | CC       | GO:0005576~extracellular region                        | 15    | 5.84           |
|          | CC       | GO:0005887~integral component of plasma membrane       | 11    | 3.41           |
|          | CC       | GO:0005925~focal adhesion                              | 5     | 2.10           |
|          | MF       | GO:0005515~protein binding                             | 33    | 5.53           |
|          | MF       | GO:0004888~transmembrane signaling receptor activity   | 5     | 2.97           |
|          | MF       | GO:0004252~serine-type endopeptidase activity          | 5     | 2.69           |
|          | MF       | GO:0005102~receptor binding                            | 5     | 2.18           |
|          | MF       | GO:0004872~receptor activity                           | 4     | 1.96           |
| Module 3 | BP       | GO:0006954~inflammatory response                       | 9     | 7.32           |

|    |                                              |    |      |
|----|----------------------------------------------|----|------|
| BP | GO:0032496~response to lipopolysaccharide    | 6  | 5.42 |
| BP | GO:0030198~extracellular matrix organization | 6  | 5.04 |
| BP | GO:0007155~cell adhesion                     | 7  | 4.34 |
| BP | GO:0060326~cell chemotaxis                   | 4  | 3.92 |
| CC | GO:0009897~external side of plasma membrane  | 8  | 7.71 |
| CC | GO:0005615~extracellular space               | 13 | 6.81 |
| CC | GO:0005886~plasma membrane                   | 17 | 4.36 |
| CC | GO:0005576~extracellular region              | 11 | 4.23 |
| CC | GO:0031012~extracellular matrix              | 5  | 3.05 |
| MF | GO:0002020~protease binding                  | 5  | 4.93 |
| MF | GO:0008201~heparin binding                   | 4  | 2.84 |
| MF | GO:0005125~cytokine activity                 | 4  | 2.72 |
| MF | GO:0008009~chemokine activity                | 3  | 2.66 |
| MF | GO:0005515~protein binding                   | 20 | 2.23 |

---

**Table S3** Top 30 nodes in PPI network by Degree method

| Gene Rank | Node          | Rank Score | Fold Change | Gene Rank | Node          | Rank Score | Fold Change |
|-----------|---------------|------------|-------------|-----------|---------------|------------|-------------|
| 1         | <i>FN1</i>    | 25         | 1.91        | 14        | <i>CXCL1</i>  | 16         | 1.91        |
| 2         | <i>MMP9</i>   | 24         | 5.01        | 17        | <i>CYBB</i>   | 15         | 5.01        |
| 2         | <i>TLR4</i>   | 24         | 1.97        | 17        | <i>LOX</i>    | 15         | 1.97        |
| 4         | <i>PTPRC</i>  | 23         | 1.97        | 19        | <i>CD163</i>  | 13         | 1.97        |
| 4         | <i>VCAM1</i>  | 23         | 2.35        | 19        | <i>CIQB</i>   | 13         | 2.35        |
| 6         | <i>TLR2</i>   | 22         | 3.51        | 19        | <i>LCP2</i>   | 13         | 3.51        |
| 7         | <i>ICAM1</i>  | 21         | 3.07        | 19        | <i>PLEK</i>   | 13         | 3.07        |
| 7         | <i>SPP1</i>   | 21         | 23.95       | 19        | <i>C3</i>     | 13         | 23.95       |
| 7         | <i>CCR1</i>   | 21         | 2.74        | 19        | <i>BGN</i>    | 13         | 2.74        |
| 10        | <i>PECAM1</i> | 20         | 1.50        | 25        | <i>COL1A1</i> | 12         | 1.50        |
| 11        | <i>TIMP1</i>  | 19         | 4.23        | 25        | <i>TYROBP</i> | 12         | 4.23        |
| 11        | <i>CXCR4</i>  | 19         | 1.82        | 27        | <i>LILRB2</i> | 11         | 1.82        |
| 13        | <i>SELL</i>   | 17         | 2.03        | 28        | <i>COL1A2</i> | 10         | 2.03        |
| 14        | <i>IGF1</i>   | 16         | 1.83        | 28        | <i>COL3A1</i> | 10         | 1.83        |
| 14        | <i>CXCL10</i> | 16         | 13.14       | 28        | <i>FBN1</i>   | 10         | 13.14       |

**Table S4** Edges in PPI network by Degree method

| Node1         | Node2         | Score | Node1         | Node2         | Score | Node1         | Node2         | Score |
|---------------|---------------|-------|---------------|---------------|-------|---------------|---------------|-------|
| <i>COL1A2</i> | <i>COL1A1</i> | 0.999 | <i>VCAM1</i>  | <i>SELL</i>   | 0.744 | <i>CXCL10</i> | <i>TIMP1</i>  | 0.568 |
| <i>MMP9</i>   | <i>TIMP1</i>  | 0.997 | <i>COL3A1</i> | <i>LOX</i>    | 0.743 | <i>VCAM1</i>  | <i>TIMP1</i>  | 0.568 |
| <i>COL3A1</i> | <i>COL1A2</i> | 0.995 | <i>MMP9</i>   | <i>CAM1</i>   | 0.737 | <i>MMP9</i>   | <i>CD163</i>  | 0.566 |
| <i>COL3A1</i> | <i>COL1A1</i> | 0.994 | <i>CXCL10</i> | <i>TLR2</i>   | 0.734 | <i>LILRB2</i> | <i>PLEK</i>   | 0.562 |
| <i>PTPRC</i>  | <i>CXCR4</i>  | 0.99  | <i>MMP9</i>   | <i>COL1A1</i> | 0.733 | <i>VCAM1</i>  | <i>PLEK</i>   | 0.562 |
| <i>FN1</i>    | <i>FBN1</i>   | 0.989 | <i>CXCL10</i> | <i>ICAM1</i>  | 0.732 | <i>CXCR4</i>  | <i>IGF1</i>   | 0.561 |
| <i>CXCL1</i>  | <i>CL10</i>   | 0.987 | <i>SPP1</i>   | <i>IGF1</i>   | 0.732 | <i>PECAM1</i> | <i>SPP1</i>   | 0.56  |
| <i>CXCL1</i>  | <i>MMP9</i>   | 0.983 | <i>CXCR4</i>  | <i>TLR2</i>   | 0.723 | <i>VCAM1</i>  | <i>TLR2</i>   | 0.56  |
| <i>TLR4</i>   | <i>BGN</i>    | 0.981 | <i>PTPRC</i>  | <i>TLR4</i>   | 0.72  | <i>MMP9</i>   | <i>COL3A1</i> | 0.558 |
| <i>SPP1</i>   | <i>TIMP1</i>  | 0.978 | <i>SPP1</i>   | <i>ICAM1</i>  | 0.719 | <i>CXCR4</i>  | <i>SPP1</i>   | 0.556 |
| <i>SPP1</i>   | <i>FN1</i>    | 0.977 | <i>LILRB2</i> | <i>CD163</i>  | 0.717 | <i>CXCL1</i>  | <i>FN1</i>    | 0.555 |
| <i>TYROBP</i> | <i>LCP2</i>   | 0.977 | <i>CXCR4</i>  | <i>SELL</i>   | 0.714 | <i>SELL</i>   | <i>LCP2</i>   | 0.554 |
| <i>CXCL10</i> | <i>CCR1</i>   | 0.972 | <i>COL1A1</i> | <i>TIMP1</i>  | 0.713 | <i>CCR1</i>   | <i>SELL</i>   | 0.553 |
| <i>FN1</i>    | <i>TIMP1</i>  | 0.972 | <i>CCR1</i>   | <i>LCP2</i>   | 0.707 | <i>FN1</i>    | <i>SELL</i>   | 0.553 |
| <i>PTPRC</i>  | <i>LCP2</i>   | 0.969 | <i>PECAM1</i> | <i>SELL</i>   | 0.703 | <i>LILRB2</i> | <i>CCR1</i>   | 0.553 |
| <i>FN1</i>    | <i>IGF1</i>   | 0.968 | <i>PTPRC</i>  | <i>ICAM1</i>  | 0.702 | <i>PECAM1</i> | <i>CXCL1</i>  | 0.552 |
| <i>FN1</i>    | <i>C3</i>     | 0.966 | <i>IGF1</i>   | <i>COL1A2</i> | 0.701 | <i>CYBB</i>   | <i>CCR1</i>   | 0.546 |
| <i>CXCR4</i>  | <i>CXCL10</i> | 0.965 | <i>PTPRC</i>  | <i>CD163</i>  | 0.699 | <i>CCR1</i>   | <i>VCAM1</i>  | 0.545 |
| <i>CXCR4</i>  | <i>CXCL1</i>  | 0.964 | <i>MMP9</i>   | <i>VCAM1</i>  | 0.696 | <i>VCAM1</i>  | <i>LCP2</i>   | 0.544 |
| <i>CXCL1</i>  | <i>CCR1</i>   | 0.96  | <i>PECAM1</i> | <i>MMP9</i>   | 0.696 | <i>TLR2</i>   | <i>C3</i>     | 0.541 |
| <i>BGN</i>    | <i>TLR2</i>   | 0.955 | <i>SPP1</i>   | <i>COL1A1</i> | 0.693 | <i>TLR4</i>   | <i>C3</i>     | 0.541 |
| <i>CYBB</i>   | <i>VCAM1</i>  | 0.954 | <i>CCR1</i>   | <i>ICAM1</i>  | 0.692 | <i>LILRB2</i> | <i>LCP2</i>   | 0.54  |
| <i>FBN1</i>   | <i>COL3A1</i> | 0.953 | <i>PECAM1</i> | <i>TLR4</i>   | 0.689 | <i>SPP1</i>   | <i>COL1A2</i> | 0.539 |
| <i>IGF1</i>   | <i>TIMP1</i>  | 0.953 | <i>CXCL10</i> | <i>VCAM1</i>  | 0.687 | <i>BGN</i>    | <i>ICAM1</i>  | 0.538 |
| <i>LILRB2</i> | <i>CYBB</i>   | 0.944 | <i>CXCR4</i>  | <i>VCAM1</i>  | 0.687 | <i>FN1</i>    | <i>C1QB</i>   | 0.524 |
| <i>PECAM1</i> | <i>PTPRC</i>  | 0.941 | <i>TLR4</i>   | <i>VCAM1</i>  | 0.687 | <i>CYBB</i>   | <i>C1QB</i>   | 0.514 |
| <i>VCAM1</i>  | <i>ICAM1</i>  | 0.94  | <i>ICAM1</i>  | <i>TLR2</i>   | 0.685 | <i>CYBB</i>   | <i>LCP2</i>   | 0.511 |
| <i>FBN1</i>   | <i>TIMP1</i>  | 0.939 | <i>IGF1</i>   | <i>ICAM1</i>  | 0.684 | <i>IGF1</i>   | <i>COL1A1</i> | 0.509 |
| <i>CXCL1</i>  | <i>C3</i>     | 0.931 | <i>CXCR4</i>  | <i>FN1</i>    | 0.683 | <i>PECAM1</i> | <i>TIMP1</i>  | 0.509 |
| <i>CXCL10</i> | <i>C3</i>     | 0.931 | <i>PTPRC</i>  | <i>TLR2</i>   | 0.682 | <i>CXCL1</i>  | <i>SELL</i>   | 0.504 |
| <i>SPP1</i>   | <i>C3</i>     | 0.93  | <i>MMP9</i>   | <i>COL1A2</i> | 0.68  | <i>TYROBP</i> | <i>SELL</i>   | 0.503 |
| <i>LILRB2</i> | <i>TYROBP</i> | 0.926 | <i>COL1A2</i> | <i>TIMP1</i>  | 0.677 | <i>ICAM1</i>  | <i>C3</i>     | 0.502 |
| <i>SPP1</i>   | <i>FBN1</i>   | 0.926 | <i>PTPRC</i>  | <i>CCR1</i>   | 0.676 | <i>CXCL1</i>  | <i>SPP1</i>   | 0.501 |
| <i>C3</i>     | <i>TIMP1</i>  | 0.921 | <i>TLR4</i>   | <i>IGF1</i>   | 0.674 | <i>MMP9</i>   | <i>SELL</i>   | 0.501 |
| <i>CXCR4</i>  | <i>C3</i>     | 0.921 | <i>BGN</i>    | <i>FBN1</i>   | 0.67  | <i>IGF1</i>   | <i>VCAM1</i>  | 0.494 |
| <i>CXCR4</i>  | <i>CCR1</i>   | 0.921 | <i>CXCR4</i>  | <i>ICAM1</i>  | 0.664 | <i>C1QB</i>   | <i>C3</i>     | 0.487 |
| <i>FBN1</i>   | <i>COL1A2</i> | 0.921 | <i>CYBB</i>   | <i>TLR2</i>   | 0.661 | <i>MMP9</i>   | <i>BGN</i>    | 0.487 |
| <i>CCR1</i>   | <i>C3</i>     | 0.914 | <i>COL3A1</i> | <i>TIMP1</i>  | 0.658 | <i>IGF1</i>   | <i>PLEK</i>   | 0.481 |
| <i>PTPRC</i>  | <i>SELL</i>   | 0.912 | <i>CXCL1</i>  | <i>VCAM1</i>  | 0.658 | <i>PECAM1</i> | <i>LOX</i>    | 0.48  |
| <i>FBN1</i>   | <i>C3</i>     | 0.906 | <i>TLR4</i>   | <i>FN1</i>    | 0.648 | <i>TLR4</i>   | <i>TIMP1</i>  | 0.474 |
| <i>CYBB</i>   | <i>MMP9</i>   | 0.903 | <i>TLR4</i>   | <i>PLEK</i>   | 0.647 | <i>MMP9</i>   | <i>FBN1</i>   | 0.472 |
| <i>TLR4</i>   | <i>TLR2</i>   | 0.902 | <i>PTPRC</i>  | <i>TYROBP</i> | 0.644 | <i>SELL</i>   | <i>PLEK</i>   | 0.472 |
| <i>FN1</i>    | <i>LOX</i>    | 0.898 | <i>PTPRC</i>  | <i>CYBB</i>   | 0.642 | <i>CCR1</i>   | <i>PLEK</i>   | 0.47  |
| <i>FN1</i>    | <i>COL1A2</i> | 0.893 | <i>SPP1</i>   | <i>CCR1</i>   | 0.641 | <i>PECAM1</i> | <i>CXCL10</i> | 0.469 |
| <i>BGN</i>    | <i>COL1A2</i> | 0.891 | <i>TLR4</i>   | <i>C1QB</i>   | 0.641 | <i>CYBB</i>   | <i>FN1</i>    | 0.468 |
| <i>C1QB</i>   | <i>TYROBP</i> | 0.89  | <i>PECAM1</i> | <i>CD163</i>  | 0.636 | <i>C1QB</i>   | <i>CCR1</i>   | 0.467 |

|        |        |       |        |        |       |        |        |       |
|--------|--------|-------|--------|--------|-------|--------|--------|-------|
| BGN    | COL1A1 | 0.873 | TLR4   | CD163  | 0.636 | PECAM1 | COL1A1 | 0.466 |
| PLEK   | LCP2   | 0.871 | TLR4   | TYROBP | 0.628 | CD163  | VCAM1  | 0.464 |
| PTPRC  | VCAM1  | 0.871 | TLR2   | SELL   | 0.627 | SPP1   | TLR4   | 0.459 |
| FN1    | COL1A1 | 0.869 | CYBB   | PLEK   | 0.625 | IGF1   | LOX    | 0.458 |
| CD163  | C1QB   | 0.85  | MMP9   | IGF1   | 0.621 | SPP1   | LOX    | 0.458 |
| FN1    | COL3A1 | 0.848 | CXCL1  | TIMP1  | 0.62  | VCAM1  | LOX    | 0.457 |
| TLR4   | CXCL10 | 0.84  | PECAM1 | LCP2   | 0.62  | CD163  | CCR1   | 0.456 |
| TLR4   | ICAM1  | 0.836 | ICAM1  | TIMP1  | 0.619 | CD163  | ICAM1  | 0.455 |
| FBN1   | COL1A1 | 0.835 | TLR4   | LCP2   | 0.619 | PECAM1 | CYBB   | 0.453 |
| TYROBP | TLR2   | 0.835 | PTPRC  | CXCL10 | 0.617 | CXCR4  | CD163  | 0.451 |
| TLR4   | MMP9   | 0.834 | TLR4   | SELL   | 0.617 | SPP1   | CXCL10 | 0.451 |
| CD163  | TYROBP | 0.827 | PTPRC  | LILRB2 | 0.61  | CYBB   | SELL   | 0.45  |
| LILRB2 | TLR2   | 0.822 | PTPRC  | CXCL1  | 0.609 | ICAM1  | LCP2   | 0.45  |
| FBN1   | LOX    | 0.82  | CCR1   | TYROBP | 0.602 | FN1    | CXCL10 | 0.448 |
| LOX    | COL1A1 | 0.82  | CXCR4  | TLR4   | 0.602 | PECAM1 | TLR2   | 0.446 |
| CYBB   | TLR4   | 0.819 | SPP1   | BGN    | 0.602 | TLR2   | PLEK   | 0.446 |
| FN1    | ICAM1  | 0.819 | MMP9   | FN1    | 0.599 | PTPRC  | COL1A1 | 0.444 |
| PECAM1 | VCAM1  | 0.818 | PECAM1 | IGF1   | 0.599 | CXCR4  | IMP1   | 0.44  |
| SPP1   | MMP9   | 0.818 | CD163  | CXCL10 | 0.598 | SPP1   | TLR2   | 0.44  |
| CXCL1  | TLR2   | 0.816 | SPP1   | VCAM1  | 0.598 | TLR2   | TIMP1  | 0.439 |
| FN1    | BGN    | 0.807 | CYBB   | TYROBP | 0.595 | MMP9   | TYROBP | 0.438 |
| ICAM1  | SELL   | 0.804 | C1QB   | PLEK   | 0.593 | FN1    | PLEK   | 0.429 |
| MMP9   | TLR2   | 0.799 | C1QB   | LCP2   | 0.592 | LILRB2 | TLR4   | 0.429 |
| BGN    | COL3A1 | 0.798 | C1QB   | VCAM1  | 0.592 | CXCR4  | LOX    | 0.428 |
| PECAM1 | ICAM1  | 0.798 | LOX    | TIMP1  | 0.583 | PECAM1 | CCR1   | 0.426 |
| PTPRC  | PLEK   | 0.791 | MMP9   | CCR1   | 0.58  | C1QB   | TLR2   | 0.425 |
| PECAM1 | CXCR4  | 0.785 | FN1    | TLR2   | 0.579 | COL3A1 | VCAM1  | 0.425 |
| CD163  | TLR2   | 0.784 | MMP9   | LOX    | 0.579 | ICAM1  | LOX    | 0.421 |
| TYROBP | PLEK   | 0.781 | PTPRC  | C1QB   | 0.579 | FN1    | CCR1   | 0.415 |
| CXCR4  | MMP9   | 0.78  | PTPRC  | SPP1   | 0.577 | BGN    | IGF1   | 0.411 |
| TLR4   | CCR1   | 0.772 | CXCL10 | SELL   | 0.576 | SPP1   | COL3A1 | 0.411 |
| MMP9   | CXCL10 | 0.769 | LILRB2 | C1QB   | 0.576 | CXCR4  | LCP2   | 0.41  |
| PTPRC  | FN1    | 0.768 | BGN    | LOX    | 0.575 | CXCL1  | IGF1   | 0.409 |
| COL1A2 | LOX    | 0.766 | PTPRC  | IGF1   | 0.575 | LILRB2 | SELL   | 0.403 |
| CXCL1  | TLR4   | 0.76  | CYBB   | ICAM1  | 0.57  | VCAM1  | C3     | 0.403 |
| PECAM1 | FN1    | 0.759 | PTPRC  | MMP9   | 0.57  | PTPRC  | LOX    | 0.401 |
| CXCL1  | CAM1   | 0.757 | BGN    | TIMP1  | 0.568 |        |        |       |
| FN1    | VCAM1  | 0.75  | CCR1   | TLR2   | 0.568 |        |        |       |

---

**Table S5** Top 30 Nodes in WGCNA Network by Degree method

| Gene Rank | Node           | Rank Score | Fold Change | Gene Rank | Node            | Rank Score | Fold Change |
|-----------|----------------|------------|-------------|-----------|-----------------|------------|-------------|
| 1         | <i>CD53</i>    | 23         | 1.85        | 16        | <i>LCP1</i>     | 15         | 2.13        |
| 1         | <i>LILRB4</i>  | 23         | 4.61        | 17        | <i>IFI16</i>    | 14         | 1.71        |
| 1         | <i>SIGLEC7</i> | 23         | 3.09        | 17        | <i>RGS1</i>     | 14         | 1.83        |
| 4         | <i>MS4A6A</i>  | 19         | 1.83        | 17        | <i>SLCO2B1</i>  | 14         | 2.14        |
| 4         | <i>MSR1</i>    | 19         | 6.02        | 17        | <i>TYROBP</i>   | 14         | 2.04        |
| 6         | <i>CCR1</i>    | 18         | 2.74        | 21        | <i>CIQC</i>     | 13         | 2.08        |
| 7         | <i>CYBB</i>    | 17         | 2.66        | 21        | <i>CLEC7A</i>   | 13         | 2.52        |
| 7         | <i>LAIR1</i>   | 17         | 2.48        | 21        | <i>GBP1</i>     | 13         | 2.71        |
| 7         | <i>SAMSN1</i>  | 17         | 2.19        | 21        | <i>HCK</i>      | 13         | 2.05        |
| 10        | <i>CIQB</i>    | 16         | 2.14        | 21        | <i>PLA2G7</i>   | 13         | 7.61        |
| 10        | <i>FPR3</i>    | 16         | 3.49        | 21        | <i>TM6SF1</i>   | 13         | 1.63        |
| 10        | <i>GPR65</i>   | 16         | 1.99        | 21        | <i>TNFSF13B</i> | 13         | 2.71        |
| 10        | <i>HAVCR2</i>  | 16         | 4.21        | 28        | <i>LCP2</i>     | 12         | 2.55        |
| 10        | <i>IL2RA</i>   | 16         | 3.68        | 28        | <i>SLA</i>      | 12         | 2.18        |
| 10        | <i>PTPRC</i>   | 16         | 1.97        | 28        | <i>TREM2</i>    | 12         | 11.85       |

**Table S6** Edges in WGCNA Network by Degree method

| Node1           | Node2          | Score | Node1           | Node2          | Score | Node1           | Node2          | Score |
|-----------------|----------------|-------|-----------------|----------------|-------|-----------------|----------------|-------|
| <i>LCP1</i>     | <i>SLA</i>     | 0.475 | <i>MS4A6A</i>   | <i>LILRB4</i>  | 0.270 | <i>LCP2</i>     | <i>MS4A6A</i>  | 0.229 |
| <i>CD53</i>     | <i>LCP1</i>    | 0.373 | <i>IL2RA</i>    | <i>SIGLEC7</i> | 0.270 | <i>TNFSF13B</i> | <i>C1QB</i>    | 0.229 |
| <i>CD53</i>     | <i>SLA</i>     | 0.367 | <i>C1QC</i>     | <i>LILRB4</i>  | 0.270 | <i>CD53</i>     | <i>SAMSN1</i>  | 0.229 |
| <i>CD53</i>     | <i>PTPRC</i>   | 0.342 | <i>C1QB</i>     | <i>CYBB</i>    | 0.269 | <i>TYROBP</i>   | <i>LILRB4</i>  | 0.228 |
| <i>LCP1</i>     | <i>PTPRC</i>   | 0.338 | <i>MS4A6A</i>   | <i>CYBB</i>    | 0.269 | <i>C1QB</i>     | <i>PLA2G7</i>  | 0.228 |
| <i>C1QB</i>     | <i>HAVCR2</i>  | 0.333 | <i>C1QC</i>     | <i>TREM2</i>   | 0.269 | <i>SLCO2B1</i>  | <i>CYBB</i>    | 0.228 |
| <i>HAVCR2</i>   | <i>LILRB4</i>  | 0.330 | <i>C1QB</i>     | <i>LILRB4</i>  | 0.268 | <i>SLCO2B1</i>  | <i>HAVCR2</i>  | 0.228 |
| <i>C1QC</i>     | <i>LAIR1</i>   | 0.328 | <i>LAIR1</i>    | <i>CYBB</i>    | 0.268 | <i>LCP2</i>     | <i>PLA2G7</i>  | 0.227 |
| <i>C1QB</i>     | <i>LAIR1</i>   | 0.328 | <i>IL2RA</i>    | <i>LAIR1</i>   | 0.268 | <i>TYROBP</i>   | <i>CYBB</i>    | 0.227 |
| <i>C1QC</i>     | <i>HAVCR2</i>  | 0.325 | <i>TNFSF13B</i> | <i>LAIR1</i>   | 0.268 | <i>LCP2</i>     | <i>CCR1</i>    | 0.227 |
| <i>C1QB</i>     | <i>SIGLEC7</i> | 0.318 | <i>MS4A6A</i>   | <i>CCR1</i>    | 0.267 | <i>LCP2</i>     | <i>IL2RA</i>   | 0.225 |
| <i>PLA2G7</i>   | <i>HAVCR2</i>  | 0.318 | <i>GPR65</i>    | <i>CYBB</i>    | 0.267 | <i>C1QC</i>     | <i>PLA2G7</i>  | 0.224 |
| <i>C1QC</i>     | <i>SIGLEC7</i> | 0.317 | <i>CLEC7A</i>   | <i>CYBB</i>    | 0.267 | <i>HCK</i>      | <i>CCR1</i>    | 0.223 |
| <i>PLA2G7</i>   | <i>FPR3</i>    | 0.314 | <i>CYBB</i>     | <i>MSR1</i>    | 0.265 | <i>FPR3</i>     | <i>TM6SF1</i>  | 0.223 |
| <i>TYROBP</i>   | <i>LAIR1</i>   | 0.312 | <i>TREM2</i>    | <i>HAVCR2</i>  | 0.265 | <i>TNFSF13B</i> | <i>C1QC</i>    | 0.223 |
| <i>SIGLEC7</i>  | <i>LILRB4</i>  | 0.312 | <i>PLA2G7</i>   | <i>MS4A6A</i>  | 0.263 | <i>CLEC7A</i>   | <i>SIGLEC7</i> | 0.222 |
| <i>FPR3</i>     | <i>CCR1</i>    | 0.312 | <i>TYROBP</i>   | <i>FPR3</i>    | 0.263 | <i>IL2RA</i>    | <i>C1QB</i>    | 0.221 |
| <i>C1QB</i>     | <i>C1QC</i>    | 0.311 | <i>TNFSF13B</i> | <i>FPR3</i>    | 0.262 | <i>LCP2</i>     | <i>LILRB4</i>  | 0.220 |
| <i>SLA</i>      | <i>PTPRC</i>   | 0.310 | <i>TNFSF13B</i> | <i>CYBB</i>    | 0.262 | <i>HCK</i>      | <i>C1QC</i>    | 0.220 |
| <i>LAIR1</i>    | <i>LILRB4</i>  | 0.309 | <i>TREM2</i>    | <i>MS4A6A</i>  | 0.262 | <i>HCK</i>      | <i>PLA2G7</i>  | 0.220 |
| <i>HAVCR2</i>   | <i>CCR1</i>    | 0.307 | <i>C1QC</i>     | <i>CYBB</i>    | 0.261 | <i>CLEC7A</i>   | <i>LAIR1</i>   | 0.220 |
| <i>SIGLEC7</i>  | <i>HAVCR2</i>  | 0.307 | <i>LCP2</i>     | <i>CYBB</i>    | 0.261 | <i>HCK</i>      | <i>C1QB</i>    | 0.219 |
| <i>FPR3</i>     | <i>MSR1</i>    | 0.306 | <i>RGS1</i>     | <i>CD53</i>    | 0.260 | <i>CLEC7A</i>   | <i>SAMSN1</i>  | 0.217 |
| <i>SIGLEC7</i>  | <i>FPR3</i>    | 0.304 | <i>LCP2</i>     | <i>FPR3</i>    | 0.260 | <i>IL2RA</i>    | <i>C1QC</i>    | 0.215 |
| <i>HAVCR2</i>   | <i>FPR3</i>    | 0.304 | <i>LCP2</i>     | <i>HAVCR2</i>  | 0.257 | <i>RGS1</i>     | <i>CYBB</i>    | 0.215 |
| <i>FPR3</i>     | <i>LILRB4</i>  | 0.304 | <i>GPR65</i>    | <i>FPR3</i>    | 0.257 | <i>TM6SF1</i>   | <i>MS4A6A</i>  | 0.215 |
| <i>IL2RA</i>    | <i>HAVCR2</i>  | 0.303 | <i>PLA2G7</i>   | <i>CCR1</i>    | 0.256 | <i>LAIR1</i>    | <i>TM6SF1</i>  | 0.214 |
| <i>TYROBP</i>   | <i>C1QC</i>    | 0.303 | <i>C1QB</i>     | <i>TREM2</i>   | 0.255 | <i>HCK</i>      | <i>MS4A6A</i>  | 0.214 |
| <i>SIGLEC7</i>  | <i>LAIR1</i>   | 0.302 | <i>GPR65</i>    | <i>LAIR1</i>   | 0.255 | <i>RGS1</i>     | <i>SLA</i>     | 0.214 |
| <i>FPR3</i>     | <i>MS4A6A</i>  | 0.298 | <i>TNFSF13B</i> | <i>MS4A6A</i>  | 0.254 | <i>CD53</i>     | <i>GPR65</i>   | 0.211 |
| <i>LAIR1</i>    | <i>MS4A6A</i>  | 0.298 | <i>LILRB4</i>   | <i>CCR1</i>    | 0.253 | <i>LCP2</i>     | <i>GPR65</i>   | 0.211 |
| <i>PLA2G7</i>   | <i>CYBB</i>    | 0.298 | <i>TREM2</i>    | <i>FPR3</i>    | 0.252 | <i>HCK</i>      | <i>IL2RA</i>   | 0.211 |
| <i>TYROBP</i>   | <i>SIGLEC7</i> | 0.298 | <i>HCK</i>      | <i>HAVCR2</i>  | 0.250 | <i>IFI16</i>    | <i>CYBB</i>    | 0.210 |
| <i>SIGLEC7</i>  | <i>CCR1</i>    | 0.297 | <i>GPR65</i>    | <i>MS4A6A</i>  | 0.249 | <i>CLEC7A</i>   | <i>MS4A6A</i>  | 0.209 |
| <i>SIGLEC7</i>  | <i>PLA2G7</i>  | 0.296 | <i>SLCO2B1</i>  | <i>FPR3</i>    | 0.248 | <i>CLEC7A</i>   | <i>CD53</i>    | 0.208 |
| <i>C1QB</i>     | <i>FPR3</i>    | 0.296 | <i>CLEC7A</i>   | <i>HAVCR2</i>  | 0.247 | <i>PLA2G7</i>   | <i>MSR1</i>    | 0.207 |
| <i>HAVCR2</i>   | <i>LAIR1</i>   | 0.295 | <i>HAVCR2</i>   | <i>GPR65</i>   | 0.247 | <i>PTPRC</i>    | <i>CYBB</i>    | 0.207 |
| <i>TYROBP</i>   | <i>C1QB</i>    | 0.294 | <i>CLEC7A</i>   | <i>FPR3</i>    | 0.246 | <i>GBP1</i>     | <i>CYBB</i>    | 0.207 |
| <i>TYROBP</i>   | <i>HAVCR2</i>  | 0.294 | <i>LCP2</i>     | <i>LAIR1</i>   | 0.246 | <i>CLEC7A</i>   | <i>PLA2G7</i>  | 0.207 |
| <i>HAVCR2</i>   | <i>MS4A6A</i>  | 0.293 | <i>TYROBP</i>   | <i>TREM2</i>   | 0.246 | <i>TYROBP</i>   | <i>CCR1</i>    | 0.206 |
| <i>C1QB</i>     | <i>MS4A6A</i>  | 0.292 | <i>CYBB</i>     | <i>SAMSN1</i>  | 0.246 | <i>CLEC7A</i>   | <i>LCP2</i>    | 0.205 |
| <i>C1QC</i>     | <i>FPR3</i>    | 0.290 | <i>HCK</i>      | <i>FPR3</i>    | 0.245 | <i>TNFSF13B</i> | <i>LILRB4</i>  | 0.205 |
| <i>TREM2</i>    | <i>LAIR1</i>   | 0.290 | <i>HCK</i>      | <i>SIGLEC7</i> | 0.245 | <i>HAVCR2</i>   | <i>SAMSN1</i>  | 0.205 |
| <i>C1QC</i>     | <i>MS4A6A</i>  | 0.289 | <i>IL2RA</i>    | <i>MS4A6A</i>  | 0.245 | <i>TM6SF1</i>   | <i>MSR1</i>    | 0.204 |
| <i>CYBB</i>     | <i>LILRB4</i>  | 0.288 | <i>TNFSF13B</i> | <i>SIGLEC7</i> | 0.244 | <i>GPR65</i>    | <i>PTPRC</i>   | 0.204 |
| <i>TNFSF13B</i> | <i>HAVCR2</i>  | 0.287 | <i>CD53</i>     | <i>CYBB</i>    | 0.244 | <i>TREM2</i>    | <i>CYBB</i>    | 0.203 |
| <i>HAVCR2</i>   | <i>CYBB</i>    | 0.286 | <i>SLCO2B1</i>  | <i>LAIR1</i>   | 0.244 | <i>LCP2</i>     | <i>C1QB</i>    | 0.202 |

|                |               |       |                |                |       |                 |                 |       |
|----------------|---------------|-------|----------------|----------------|-------|-----------------|-----------------|-------|
| <i>IL2RA</i>   | <i>FPR3</i>   | 0.285 | <i>HCK</i>     | <i>LAIR1</i>   | 0.243 | <i>TYROBP</i>   | <i>HCK</i>      | 0.202 |
| <i>HAVCR2</i>  | <i>MSR1</i>   | 0.285 | <i>HCK</i>     | <i>CYBB</i>    | 0.241 | <i>LCP2</i>     | <i>HCK</i>      | 0.202 |
| <i>LAIR1</i>   | <i>CCR1</i>   | 0.285 | <i>LCP2</i>    | <i>SIGLEC7</i> | 0.241 | <i>TNFSF13B</i> | <i>GPR65</i>    | 0.202 |
| <i>FPR3</i>    | <i>CYBB</i>   | 0.284 | <i>IL2RA</i>   | <i>CCR1</i>    | 0.239 | <i>GPR65</i>    | <i>MSR1</i>     | 0.202 |
| <i>SIGLEC7</i> | <i>MS4A6A</i> | 0.284 | <i>C1QB</i>    | <i>CCR1</i>    | 0.238 | <i>CLEC7A</i>   | <i>LCP1</i>     | 0.202 |
| <i>FPR3</i>    | <i>LAIR1</i>  | 0.284 | <i>PLA2G7</i>  | <i>LILRB4</i>  | 0.236 | <i>FPR3</i>     | <i>SAMSN1</i>   | 0.202 |
| <i>IL2RA</i>   | <i>CYBB</i>   | 0.283 | <i>MSR1</i>    | <i>CCR1</i>    | 0.236 | <i>TREM2</i>    | <i>LILRB4</i>   | 0.201 |
| <i>CYBB</i>    | <i>CCR1</i>   | 0.283 | <i>HAVCR2</i>  | <i>GBP1</i>    | 0.235 | <i>LCP2</i>     | <i>TNFSF13B</i> | 0.201 |
| <i>SIGLEC7</i> | <i>TREM2</i>  | 0.282 | <i>RGS1</i>    | <i>LCP1</i>    | 0.235 | <i>IFI16</i>    | <i>HAVCR2</i>   | 0.201 |
| <i>TYROBP</i>  | <i>MS4A6A</i> | 0.279 | <i>C1QC</i>    | <i>CCR1</i>    | 0.234 | <i>LCP2</i>     | <i>MSR1</i>     | 0.201 |
| <i>SIGLEC7</i> | <i>MSR1</i>   | 0.279 | <i>IL2RA</i>   | <i>LILRB4</i>  | 0.233 | <i>IL2RA</i>    | <i>PLA2G7</i>   | 0.201 |
| <i>PLA2G7</i>  | <i>LAIR1</i>  | 0.278 | <i>HCK</i>     | <i>LILRB4</i>  | 0.232 | <i>TNFSF13B</i> | <i>CCR1</i>     | 0.201 |
| <i>LAIR1</i>   | <i>MSR1</i>   | 0.274 | <i>SLCO2B1</i> | <i>MS4A6A</i>  | 0.231 | <i>GPR65</i>    | <i>CCR1</i>     | 0.201 |
| <i>SIGLEC7</i> | <i>CYBB</i>   | 0.274 | <i>SIGLEC7</i> | <i>GPR65</i>   | 0.231 | <i>CLEC7A</i>   | <i>HCK</i>      | 0.200 |
| <i>MS4A6A</i>  | <i>MSR1</i>   | 0.273 | <i>SLCO2B1</i> | <i>SIGLEC7</i> | 0.231 | <i>SIGLEC7</i>  | <i>TM6SF1</i>   | 0.200 |

---

**Table S7** Biological functions and cancer relations of hub genes in PPI and WGCNA networks

| Gene name                                         | Gene ID* | Gene function Summary                                                                                                                                                                                                                                                                                                                                                                                                                   | Representative studies associated with cancer                                                                                                                                                                                                                                                                 |
|---------------------------------------------------|----------|-----------------------------------------------------------------------------------------------------------------------------------------------------------------------------------------------------------------------------------------------------------------------------------------------------------------------------------------------------------------------------------------------------------------------------------------|---------------------------------------------------------------------------------------------------------------------------------------------------------------------------------------------------------------------------------------------------------------------------------------------------------------|
| <b>Common hub genes in PPI and WGCNA networks</b> |          |                                                                                                                                                                                                                                                                                                                                                                                                                                         |                                                                                                                                                                                                                                                                                                               |
| <i>TYROBP</i>                                     | 7305     | This gene encodes a transmembrane signaling polypeptide which contains an immunoreceptor tyrosine-based activation motif (ITAM) in its cytoplasmic domain. The encoded protein may associate with the killer-cell inhibitory receptor (KIR) family of membrane glycoproteins and may act as an activating signal transduction element.                                                                                                  | Shabo, et al. found TYROBP overexpression was associated with skeletal and liver metastasis in patients with breast cancer[1].<br>Takamiya, et al. found TYROBP was mediated at the interaction between tumor associated macrophages and cancer cells and contributed to tumor progression in lung cancer[2]. |
| <i>C1QB</i>                                       | 713      | This gene encodes the B-chain polypeptide of serum complement subcomponent C1q, which associates with C1r and C1s to yield the first component of the serum complement system. C1q is composed of 18 polypeptide chains which include 6 A-chains, 6 B-chains, and 6 C-chains.                                                                                                                                                           | Luo, et al. found altered expression of C1QB in blood could be identified as a biomarker for early melanoma[3].                                                                                                                                                                                               |
| <i>PTPRC</i>                                      | 5788     | The protein encoded by this gene is a member of the protein tyrosine phosphatase (PTP) family. PTPs are known to be signaling molecules that regulate a variety of cellular processes including cell growth, differentiation, mitosis, and oncogenic transformation.                                                                                                                                                                    | Ju, et al. reported that PTPRC polymorphism was associated with susceptibility to diffuse-type gastric cancer and gene expression [4].<br>Ahmadvand, et al. found PTPRC <sup>+</sup> TILs served as a negative predictor for OS and PFS of breast cancer patients[5].                                         |
| <i>LCP2</i>                                       | 3937     | This gene encodes an adapter protein that acts as a substrate of the T cell antigen receptor (TCR)-activated protein tyrosine kinase pathway. The encoded protein associates with growth factor receptor bound protein 2, and is thought to play a role TCR-mediated intracellular signal transduction.                                                                                                                                 | Chu, et al identified LCP2 as one of the DEGs which contributed to liver metastasis of colon cancer[6].                                                                                                                                                                                                       |
| <i>CYBB</i>                                       | 1536     | Cytochrome b (-245) is composed of cytochrome b alpha (CYBA) and beta (CYBB) chain. It has been proposed as a primary component of the microbicidal oxidase system of phagocytes. CYBB deficiency is one of five described biochemical defects associated with chronic granulomatous disease (CGD).                                                                                                                                     | Wang, et al identified that CYBB as a new biomarker and a potential therapeutic target for gastric cancer [7].<br>Zhang, et al. identified CYBB as one of the hub genes in hypoxia networks in ovarian cancer via bioinformatics analysis[8].                                                                 |
| <i>CCR1</i>                                       | 1230     | This gene encodes a member of the beta chemokine receptor family, which is predicted to be a seven transmembrane protein similar to G protein-coupled receptors. The ligands of this receptor include macrophage inflammatory protein 1 alpha (MIP-1 alpha), regulated on activation normal T expressed and secreted protein (RANTES), monocyte chemoattractant protein 3 (MCP-3), and myeloid progenitor inhibitory factor-1 (MPIF-1). | Itatani, et al. found that CCR1+ myeloid cells promoted tumor invasion and liver metastasis in colorectal cancer [9].<br>Sugasawa, et al found that gastric cancer cells showed positive expression of CCR1 [10].                                                                                             |
| <b>Other hub genes in PPI network</b>             |          |                                                                                                                                                                                                                                                                                                                                                                                                                                         |                                                                                                                                                                                                                                                                                                               |
| <i>LOX</i>                                        | 4015     | This gene encodes a member of the lysyl oxidase family of proteins. Alternative splicing results in multiple transcript variants, at least one of which encodes a preproprotein that is proteolytically processed to generate a regulatory propeptide and the mature enzyme.                                                                                                                                                            | Zhao, et al reported that LOX inhibition downregulated MMP-2 and MMP-9 in gastric cancer tissues and cells [11].                                                                                                                                                                                              |
| <i>COL3A1</i>                                     | 1281     | This gene encodes the pro-alpha1 chains of type III collagen, a fibrillar collagen that is                                                                                                                                                                                                                                                                                                                                              | Liu, et al. identified COL3A1 as one of the hub                                                                                                                                                                                                                                                               |

|                      |      |                                                                                                                                                                                                                                                                                                                                                                                                     |                                                                                                                                                                                                                                                           |
|----------------------|------|-----------------------------------------------------------------------------------------------------------------------------------------------------------------------------------------------------------------------------------------------------------------------------------------------------------------------------------------------------------------------------------------------------|-----------------------------------------------------------------------------------------------------------------------------------------------------------------------------------------------------------------------------------------------------------|
|                      |      | found in extensible connective tissues such as skin, lung, uterus, intestine and the vascular system, frequently in association with type I collagen.                                                                                                                                                                                                                                               | genes correlated with the pathogenesis of gastric cancer based on bioinformatics analysis[12].                                                                                                                                                            |
| <b><i>FN1</i></b>    | 2335 | This gene encodes fibronectin, a glycoprotein present in a soluble dimeric form in plasma, and in a dimeric or multimeric form at the cell surface and in extracellular matrix. The encoded preproprotein is proteolytically processed to generate the mature protein.                                                                                                                              | Wang, et al. found that microRNA-432 targeting FN1 inhibited cell proliferation and invasion of cervical cancer[13].                                                                                                                                      |
| <b><i>FBN1</i></b>   | 2200 | This gene encodes a member of the fibrillin family of proteins. The encoded preproprotein is proteolytically processed to generate two proteins including the extracellular matrix component fibrillin-1 and the protein hormone asprosin. Fibrillin-1 is an extracellular matrix glycoprotein that serves as a structural component of calcium-binding microfibrils.                               | Shi, et al. found that FBN1 as a potential biomarker of progression and prognosis in bladder cancer[14]. Yang, et al reported that MiR-133b inhibited the proliferative, migratory and invasive abilities of GC cells by increasing FBN1 expression [15]. |
| <b><i>CXCR4</i></b>  | 7852 | This gene encodes a CXC chemokine receptor specific for stromal cell-derived factor-1. The protein has 7 transmembrane regions and is located on the cell surface. It acts with the CD4 protein to support HIV entry into cells and is also highly expressed in breast cancer cells.                                                                                                                | Lzumi, et al. found that the inhibition of CXCL12/CXCR4 signaling in GC cells may be a promising therapeutic strategy against GC cell invasion [16].                                                                                                      |
| <b><i>PECAM1</i></b> | 5175 | The protein encoded by this gene is found on the surface of platelets, monocytes, neutrophils, and some types of T-cells, and makes up a large portion of endothelial cell intercellular junctions. The encoded protein is a member of the immunoglobulin superfamily and is likely involved in leukocyte migration, angiogenesis, and integrin activation.                                         | Terashima, et al. reported that PECAM1 was associated with hematogenous, lymph Node, and peritoneal recurrence in stage II/III gastric cancer patients enrolled in the ACTS-GC Study[17].                                                                 |
| <b><i>BGN</i></b>    | 633  | This gene encodes a member of the small leucine-rich proteoglycan (SLRP) family of proteins. The encoded preproprotein is proteolytically processed to generate the mature protein, which plays a role in bone growth, muscle development and regeneration, and collagen fibril assembly in multiple tissues.                                                                                       | Sun, et al. identified BGN as one of the core genes associated with tumor metastasis in gastric cancer[18].                                                                                                                                               |
| <b><i>IGF1</i></b>   | 3479 | The protein encoded by this gene is similar to insulin in function and structure and is a member of a family of proteins involved in mediating growth and development. The encoded protein is processed from a precursor, bound by a specific receptor, and secreted. Defects in this gene are a cause of insulin-like growth factor I deficiency.                                                  | Du, et al found that IGF1 was upregulated to promote gastric cancer metastasis [19].                                                                                                                                                                      |
| <b><i>TLR2</i></b>   | 7097 | The protein encoded by this gene is a member of the Toll-like receptor (TLR) family which plays a fundamental role in pathogen recognition and activation of innate immunity. This protein is a cell-surface protein that can form heterodimers with other TLR family members to recognize conserved molecules derived from microorganisms known as pathogen-associated molecular patterns (PAMPs). | West, et al. identified a TLR2-regulated gene signature as a predictor of poor outcomes in patients with gastric cancer [20].                                                                                                                             |
| <b><i>COL1A2</i></b> | 1278 | This gene encodes the pro-alpha2 chain of type I collagen whose triple helix comprises two alpha1 chains and one alpha2 chain. Type I is a fibril-forming collagen found in most connective tissues and is abundant in bone, cornea, dermis and tendon.                                                                                                                                             | Li, et al. identified COL1A2 as a candidate prognostic factor in gastric cancer[21]. Ao, et al. found that silencing of COL1A2 inhibited gastric cancer cell proliferation, migration and invasion[22].                                                   |
| <b><i>VCAM1</i></b>  | 7412 | This gene is a member of the Ig superfamily and encodes a cell surface sialoglycoprotein expressed by cytokine-activated endothelium. This type I membrane protein mediates leukocyte-endothelial cell adhesion and signal transduction, and may play a role in the development of atherosclerosis and rheumatoid arthritis.                                                                        | Shen, et al. found that cancer-associated fibroblasts-derived VCAM1 facilitated tumor invasion in gastric cancer [23].                                                                                                                                    |
| <b><i>COL1A1</i></b> | 1277 | This gene encodes the pro-alpha1 chains of type I collagen whose triple helix comprises two alpha1 chains and one alpha2 chain. Type I is a fibril-forming collagen found in most                                                                                                                                                                                                                   | Liu, et al. identified COL1A1 as one of the genes in prognostic signature of gastric cancer [24].                                                                                                                                                         |

|                      |       |                                                                                                                                                                                                                                                                                                                                                                                                                                                                                 |                                                                                                                                                                                                            |
|----------------------|-------|---------------------------------------------------------------------------------------------------------------------------------------------------------------------------------------------------------------------------------------------------------------------------------------------------------------------------------------------------------------------------------------------------------------------------------------------------------------------------------|------------------------------------------------------------------------------------------------------------------------------------------------------------------------------------------------------------|
|                      |       | connective tissues and is abundant in bone, cornea, dermis and tendon.                                                                                                                                                                                                                                                                                                                                                                                                          | Wang, et al. found that miR-129-5p suppresses gastric cancer cell invasion by inhibiting COL1A1[25].                                                                                                       |
| <b><i>SELL</i></b>   | 6402  | This gene encodes a cell surface adhesion molecule that belongs to a family of adhesion/homing receptors. The encoded protein contains a C-type lectin-like domain, a calcium-binding epidermal growth factor-like domain, and two short complement-like repeats. The gene product is required for binding and subsequent rolling of leucocytes on endothelial cells, facilitating their migration into secondary lymphoid organs and inflammation sites.                       | Few studies were reported                                                                                                                                                                                  |
| <b><i>C3</i></b>     | 718   | Its activation is required for both classical and alternative complement activation pathways. The encoded preproprotein is proteolytically processed to generate alpha and beta subunits that form the mature protein, which is then further processed to generate numerous peptide products.                                                                                                                                                                                   | Boire, et al. found that C3 adapted the cerebrospinal fluid for leptomeningeal metastasis[26].                                                                                                             |
| <b><i>TLR4</i></b>   | 7099  | The protein encoded by this gene is a member of the Toll-like receptor (TLR) family which plays a fundamental role in pathogen recognition and activation of innate immunity. TLRs are highly conserved from Drosophila to humans and share structural and functional similarities. They recognize pathogen-associated molecular patterns that are expressed on infectious agents, and mediate the production of cytokines necessary for the development of effective immunity. | Zandi, et al. found that TLR4 blockade suppressed ovarian and breast cancer cells invasion through inhibition of extracellular matrix degradation and EMT[27].                                             |
| <b><i>LILRB2</i></b> | 10288 | This gene is a member of the leukocyte immunoglobulin-like receptor (LIR) family, which is found in a gene cluster at chromosomal region 19q13.4. The encoded protein belongs to the subfamily B class of LIR receptors which contain two or four extracellular immunoglobulin domains, a transmembrane domain, and two to four cytoplasmic immunoreceptor tyrosine-based inhibitory motifs (ITIMs)                                                                             | Shao, et al. found that LILRB2 was critical for endometrial cancer progression[28].<br>Liu, et al. found that LILRB2 promoted the propagation of lung cancer cells[29].                                    |
| <b><i>ICAM1</i></b>  | 3383  | This gene encodes a cell surface glycoprotein which is typically expressed on endothelial cells and cells of the immune system. It binds to integrins of type CD11a / CD18, or CD11b / CD18 and is also exploited by Rhinovirus as a receptor.                                                                                                                                                                                                                                  | Li, et al identified LILRB2 as one of the genes in metastasis model of human gastric cancer in nude mice [30].                                                                                             |
| <b><i>TIMP1</i></b>  | 7076  | This gene belongs to the TIMP gene family. The proteins encoded by this gene family are natural inhibitors of the matrix metalloproteinases (MMPs), a group of peptidases involved in degradation of the extracellular matrix.                                                                                                                                                                                                                                                  | Liu, et al. identified TIMP1 as one of the key genes associated with the pathogenesis and prognosis of gastric cancer by bioinformatic analysis [31].                                                      |
| <b><i>SPP1</i></b>   | 6696  | The protein encoded by this gene is involved in the attachment of osteoclasts to the mineralized bone matrix. The encoded protein is secreted and binds hydroxyapatite with high affinity.                                                                                                                                                                                                                                                                                      | Choe, et al. found that upregulation of SPP1 was related to poor survival outcomes in colorectal cancer[32].                                                                                               |
| <b><i>CD163</i></b>  | 9332  | The protein encoded by this gene is a member of the scavenger receptor cysteine-rich (SRCR) superfamily, and is exclusively expressed in monocytes and macrophages. It functions as an acute phase-regulated receptor involved in the clearance and endocytosis of hemoglobin/haptoglobin complexes by macrophages, and may thereby protect tissues from free hemoglobin-mediated oxidative damage.                                                                             | Ding, et al. identified CD163 as a novel biomarker for colorectal cancer[33].<br>Shiraishi, et al. found that CD163 was required for protumoral activation of macrophages in human and murine sarcoma[34]. |
| <b><i>MMP9</i></b>   | 4318  | Proteins of the matrix metalloproteinase (MMP) family are involved in the breakdown of extracellular matrix in normal physiological processes, such as embryonic development, reproduction, and tissue remodeling, as well as in disease processes, such as arthritis and metastasis.                                                                                                                                                                                           | Ren, et al. found that coronin3 promoted gastric cancer metastasis via the up-regulation of MMP9 and cathepsin K [35].                                                                                     |
| <b><i>CXCL10</i></b> | 3627  | This antimicrobial gene encodes a chemokine of the CXC subfamily and ligand for the                                                                                                                                                                                                                                                                                                                                                                                             | Zhou, et al reported that CXCL10/CXCR3 axis                                                                                                                                                                |

|                                         |       |                                                                                                                                                                                                                                                                                                                                                                                                                                                                                                              |                                                                                                                                          |
|-----------------------------------------|-------|--------------------------------------------------------------------------------------------------------------------------------------------------------------------------------------------------------------------------------------------------------------------------------------------------------------------------------------------------------------------------------------------------------------------------------------------------------------------------------------------------------------|------------------------------------------------------------------------------------------------------------------------------------------|
|                                         |       | receptor CXCR3. Binding of this protein to CXCR3 results in pleiotropic effects, including stimulation of monocytes, natural killer and T-cell migration, and modulation of adhesion molecule expression.                                                                                                                                                                                                                                                                                                    | promoted the invasion of gastric cancer [36].                                                                                            |
| <i>PLEK</i>                             | 5341  | PLEK (Pleckstrin) is a Protein Coding gene. Diseases associated with PLEK include Aarskog-Scott Syndrome and Agammaglobulinemia, X-Linked. Among its related pathways are Response to elevated platelet cytosolic Ca <sup>2+</sup> .                                                                                                                                                                                                                                                                         | Few studies were reported                                                                                                                |
| <i>CXCL1</i>                            | 2919  | This antimicrobial gene encodes a member of the CXC subfamily of chemokines. The encoded protein is a secreted growth factor that signals through the G-protein coupled receptor, CXC receptor 2. This protein plays a role in inflammation and as a chemoattractant for neutrophils.                                                                                                                                                                                                                        | Cheng, et al. found that overexpression of CXCL1 and its receptor CXCR2 promoted tumor invasion in gastric cancer [37].                  |
| <b>Other hub genes in WGCNA network</b> |       |                                                                                                                                                                                                                                                                                                                                                                                                                                                                                                              |                                                                                                                                          |
| <i>RGS1</i>                             | 5996  | This gene encodes a member of the regulator of G-protein signalling family. This protein is located on the cytosolic side of the plasma membrane and contains a conserved, 120 amino acid motif called the RGS domain. The protein attenuates the signalling activity of G-proteins by binding to activated, GTP-bound G alpha subunits and acting as a GTPase activating protein (GAP), increasing the rate of conversion of the GTP to GDP.                                                                | Tanabe, et al. found that RGS1 was up-regulated in diffuse-type GC cells[38].                                                            |
| <i>CLEC7A</i>                           | 64581 | This gene encodes a member of the C-type lectin/C-type lectin-like domain (CTL/CTLD) superfamily. The encoded glycoprotein is a small type II membrane receptor with an extracellular C-type lectin-like domain fold and a cytoplasmic domain with an immunoreceptor tyrosine-based activation motif. It functions as a pattern-recognition receptor that recognizes a variety of beta-1,3-linked and beta-1,6-linked glucans from fungi and plants, and in this way plays a role in innate immune response. | Few studies were reported                                                                                                                |
| <i>LILRB4</i>                           | 11006 | This gene is a member of the leukocyte immunoglobulin-like receptor (LIR) family, which is found in a gene cluster at chromosomal region 19q13.4. The encoded protein belongs to the subfamily B class of LIR receptors which contain two or four extracellular immunoglobulin domains, a transmembrane domain, and two to four cytoplasmic immunoreceptor tyrosine-based inhibitory motifs (ITIMs).                                                                                                         | Zhang, et al. reported that LILRB4 played a key role in gastric cancer immune escape [39].                                               |
| <i>HCK</i>                              | 3055  | The protein encoded by this gene is a member of the Src family of tyrosine kinases. This protein is primarily hemopoietic, particularly in cells of the myeloid and B-lymphoid lineages. It may help couple the Fc receptor to the activation of the respiratory burst. In addition, it may play a role in neutrophil migration and in the degranulation of neutrophils.                                                                                                                                     | Poh, et al. found that HCK inhibition impaired STAT3-dependent gastric tumor growth in mice[40].                                         |
| <i>SLCO2B1</i>                          | 11309 | This locus encodes a member of the organic anion-transporting polypeptide family of membrane proteins. The protein encoded by this locus may function in regulation of placental uptake of sulfated steroids.                                                                                                                                                                                                                                                                                                | Hahn,et al. found that SLCO2B1 might contribute to castration resistance of prostate cancer[41].                                         |
| <i>CIQC</i>                             | 714   | This gene encodes the C-chain polypeptide of serum complement subcomponent C1q, which associates with C1r and C1s to yield the first component of the serum complement system.                                                                                                                                                                                                                                                                                                                               | Few studies were reported                                                                                                                |
| <i>GBP1</i>                             | 2633  | Guanylate binding protein expression is induced by interferon. Guanylate binding proteins are characterized by their ability to specifically bind guanine nucleotides (GMP, GDP, and GTP) and are distinguished from the GTP-binding proteins by the presence of 2 binding motifs rather than 3.                                                                                                                                                                                                             | Ji, et al. reported that overexpression of GBP1 predicted poor prognosis and promotes tumor growth in human glioblastoma multiforme[42]. |
| <i>LAIR1</i>                            | 3903  | The protein encoded by this gene is an inhibitory receptor found on peripheral                                                                                                                                                                                                                                                                                                                                                                                                                               | Jingushi, et al. found that LAIR1 promoted                                                                                               |

|                 |       |                                                                                                                                                                                                                                                                                                                                                                                                                            |                                                                                                                                                                                                   |
|-----------------|-------|----------------------------------------------------------------------------------------------------------------------------------------------------------------------------------------------------------------------------------------------------------------------------------------------------------------------------------------------------------------------------------------------------------------------------|---------------------------------------------------------------------------------------------------------------------------------------------------------------------------------------------------|
|                 |       | mononuclear cells, including natural killer cells, T cells, and B cells. Inhibitory receptors regulate the immune response to prevent lysis of cells recognized as self. The gene is a member of both the immunoglobulin superfamily and the leukocyte-associated inhibitory receptor family.                                                                                                                              | tumorigenesis in renal cell carcinoma [43].                                                                                                                                                       |
| <b>HAVCR2</b>   | 84868 | The protein encoded by this gene belongs to the immunoglobulin superfamily, and TIM family of proteins. CD4-positive T helper lymphocytes can be divided into types 1 (Th1) and 2 (Th2) on the basis of their cytokine secretion patterns.                                                                                                                                                                                 | Wang, et al found that HAVCR2 expression were independent prognostic factor for patients with gastric cancer [44].                                                                                |
| <b>FPR3</b>     | 2359  | FPR3 (Formyl Peptide Receptor 3) is a Protein Coding gene. Diseases associated with FPR3 include Rubeosis Iridis. Among its related pathways are Signaling by GPCR and Peptide ligand-binding receptors.                                                                                                                                                                                                                   | Cheng, et al reported that FPR3 were associated with invasiveness of gastric cancer [45].                                                                                                         |
| <b>TNFSF13B</b> | 10673 | The protein encoded by this gene is a cytokine that belongs to the tumor necrosis factor (TNF) ligand family. This cytokine is a ligand for receptors TNFRSF13B/TACI, TNFRSF17/BCMA, and TNFRSF13C/BAFFR.                                                                                                                                                                                                                  | Li, et al identified TNFSF13B as one of the hub genes in kidney renal clear cell carcinoma microenvironment [46].                                                                                 |
| <b>TREM2</b>    | 54209 | This gene encodes a membrane protein that forms a receptor signaling complex with the TYRO protein tyrosine kinase binding protein. The encoded protein functions in immune response and may be involved in chronic inflammation by triggering the production of constitutive inflammatory cytokines.                                                                                                                      | Zhang, et al found that high TREM2 expression correlates with poor prognosis in gastric cancer [47]. Tang, et al reported that TREM2 acts as a tumor suppressor in hepatocellular carcinoma [48]. |
| <b>PLA2G7</b>   | 7941  | The protein encoded by this gene is a secreted enzyme that catalyzes the degradation of platelet-activating factor to biologically inactive products. Defects in this gene are a cause of platelet-activating factor acetylhydrolase deficiency.                                                                                                                                                                           | Lehtinen, et al found that PLA2G7 regulated EMT in cultured breast cancer cells [49].                                                                                                             |
| <b>SIGLEC7</b>  | 27036 | SIGLEC7 (Sialic Acid Binding Ig Like Lectin 7) is a Protein Coding gene. Diseases associated with SIGLEC7 include Congenital Disorder Of Glycosylation, Type Iic and Autoimmune Disease Of Peripheral Nervous System.                                                                                                                                                                                                      | Few studies were reported                                                                                                                                                                         |
| <b>TM6SF1</b>   | 53346 | TM6SF1 (Transmembrane 6 Superfamily Member 1) is a Protein Coding gene.                                                                                                                                                                                                                                                                                                                                                    | Few studies were reported                                                                                                                                                                         |
| <b>IFI16</b>    | 3428  | This gene encodes a member of the HIN-200 (hematopoietic interferon-inducible nuclear antigens with 200 amino acid repeats) family of cytokines. The encoded protein contains domains involved in DNA binding, transcriptional regulation, and protein-protein interactions.                                                                                                                                               | Yang, et al found that IFI16 showed lower mRNA expression in the colorectal tumor tissues [50].                                                                                                   |
| <b>MS4A6A</b>   | 64231 | This gene encodes a member of the membrane-spanning 4A gene family. Members of this nascent protein family are characterized by common structural features and similar intron/exon splice boundaries and display unique expression patterns among hematopoietic cells and nonlymphoid tissues.                                                                                                                             | Pan, et al reported that MS4A6A was relevant to pathological grade and prognosis in ovarian cancer [51].                                                                                          |
| <b>CD53</b>     | 963   | The protein encoded by this gene is a member of the transmembrane 4 superfamily, also known as the tetraspanin family. Most of these members are cell-surface proteins that are characterized by the presence of four hydrophobic domains.                                                                                                                                                                                 | Few studies were reported                                                                                                                                                                         |
| <b>MSR1</b>     | 4481  | This gene encodes the class A macrophage scavenger receptors, which include three different types (1, 2, 3) generated by alternative splicing of this gene. These receptors or isoforms are macrophage-specific trimeric integral membrane glycoproteins and have been implicated in many macrophage-associated physiological and pathological processes including atherosclerosis, Alzheimer's disease, and host defense. | Rose, et al found that MSR1 repeats modulated gene expression and affected risk of breast and prostate cancer [52].                                                                               |
| <b>SAMSN1</b>   | 64092 | SAMSN1 is a member of a novel gene family of putative adaptors and scaffold proteins containing SH3 and SAM (sterile alpha motif) domains                                                                                                                                                                                                                                                                                  | Kanda, et al reported that downregulation of SAMSN1 transcription affected the progression and recurrence of gastric cancer [53].                                                                 |

|              |      |                                                                                                                                                                                                                                              |                                                                                                                                       |
|--------------|------|----------------------------------------------------------------------------------------------------------------------------------------------------------------------------------------------------------------------------------------------|---------------------------------------------------------------------------------------------------------------------------------------|
|              |      |                                                                                                                                                                                                                                              | Sueoka, et al found that suppression of SAMS1 expression is associated with the malignant phenotype of hepatocellular carcinoma [54]. |
| <b>LCP1</b>  | 3936 | Plastins are a family of actin-binding proteins that are conserved throughout eukaryote evolution and expressed in most tissues of higher eukaryotes. In humans, two ubiquitous plastin isoforms (L and T) have been identified.             | Koide, et al reported that LCP1 is a useful biomarker for determining progression of oral squamous cell carcinomas [55].              |
| <b>GPR65</b> | 8477 | GPR65 (G Protein-Coupled Receptor 65) is a Protein Coding gene. Diseases associated with GPR65 include Gastric Cancer and B-Cell Childhood Acute Lymphoblastic Leukemia. Among its related pathways are Signaling by GPCR and RET signaling. | Li, et al reported that Long non-coding RNA GPR65-1 was up-regulated in gastric cancer and promoted tumor growth [56].                |
| <b>SLA</b>   | 6503 | SLA (Src Like Adaptor) is a Protein Coding gene. Diseases associated with SLA include Inflammatory Bowel Disease 25.                                                                                                                         | Few studies were reported                                                                                                             |
| <b>IL2RA</b> | 3559 | The interleukin 2 (IL2) receptor alpha (IL2RA) and beta (IL2RB) chains, together with the common gamma chain (IL2RG), constitute the high-affinity IL2 receptor.                                                                             | Jia, et al found that IL2RA polymorphisms were associated with lung cancer risk in the Chinese Han population [57].                   |

\*derived from: <https://www.ncbi.nlm.nih.gov/gene>;

Note: all information was achieved from GENE (<https://www.ncbi.nlm.nih.gov/gene>) and GeneCards (<http://www.genecards.org>)

## References

- Shabo I, Olsson H, Stål O, Svanvik J. Breast cancer expression of DAP12 is associated with skeletal and liver metastases and poor survival. Clin Breast Cancer. 2013;13(5):371-377.
- Takamiya R, Ohtsubo K, Takamatsu S, Taniguchi N, Angata T. The interaction between Siglec-15 and tumor-associated sialyl-Tn antigen enhances TGF- $\beta$  secretion from monocytes/macrophages through the DAP12-Syk pathway. Glycobiology. 2013;23(2):178-187.
- Luo Y, Robinson S, Fujita J, et al. Transcriptome profiling of whole blood cells identifies PLEK2 and C1QB in human melanoma. PLoS One. 2011;6(6):e20971.
- Camacho M, Agüero A, Sumarroca A, et al. Prognostic value of CD45 transcriptional expression in head and neck cancer. Eur Arch Otorhinolaryngol. 2018;275(1):225-232.
- Ahmadvand S, Faghhih Z, Montazer M, et al. Importance of CD45RO+ tumor-infiltrating lymphocytes in post-operative survival of breast cancer patients. Cell Oncol (Dordr). 2019;42(3):343-356.
- Chu S, Wang H, Yu M. A putative molecular network associated with colon cancer metastasis constructed from microarray data. World J Surg Oncol. 2017;15(1):115.
- Wang P, Shi Q, Deng WH, et al. Relationship between expression of NADPH oxidase 2 and invasion and prognosis of human gastric cancer. World J Gastroenterol. 2015;21(20):6271-6279. doi:10.3748/wjg.v21.i20.6271
- Zhang K, Kong X, Feng G, et al. Investigation of hypoxia networks in ovarian cancer via bioinformatics analysis. J Ovarian Res. 2018;11(1):16. Published 2018 Feb 26.
- Itatani Y, Kawada K, Fujishita T, et al. Loss of SMAD4 from colorectal cancer cells promotes CCL15 expression to recruit CCR1+ myeloid cells and facilitate liver metastasis. Gastroenterology. 2013;145(5):1064-1075.e11.
- Sugasawa H, Ichikura T, Tsujimoto H, et al. Prognostic significance of expression of CCL5/RANTES receptors in patients with gastric cancer. J Surg Oncol. 2008;97(5):445-450. doi:10.1002/jso.20984
- Zhao L, Niu H, Liu Y, et al. LOX inhibition downregulates MMP-2 and MMP-9 in gastric cancer tissues and cells. J Cancer. 2019;10(26):6481-6490. Published 2019 Oct 20. doi:10.7150/jca.33223

12. Liu X, Wu J, Zhang D, et al. Identification of Potential Key Genes Associated With the Pathogenesis and Prognosis of Gastric Cancer Based on Integrated Bioinformatics Analysis. *Front Genet.* 2018;9:265.
13. Wang S, Gao B, Yang H, Liu X, Wu X, Wang W. MicroRNA-432 is downregulated in cervical cancer and directly targets FN1 to inhibit cell proliferation and invasion. *Oncol Lett.* 2019;18(2):1475-1482.
14. Shi S, Tian B. Identification of biomarkers associated with progression and prognosis in bladder cancer via co-expression analysis. *Cancer Biomark.* 2019;24(2):183-193.
15. Yang D, Zhao D, Chen X. MiR-133b inhibits proliferation and invasion of gastric cancer cells by up-regulating FBN1 expression. *Cancer Biomark.* 2017;19(4):425-436. doi:10.3233/CBM-160421
16. Martinez-Ordóñez A, Seoane S, Cabezas P, et al. Breast cancer metastasis to liver and lung is facilitated by Pit-1-CXCL12-CXCR4 axis. *Oncogene.* 2018;37(11):1430-1444.
17. Terashima M, Ichikawa W, Ochiai A, et al. TOP2A, GGH, and PECAM1 are associated with hematogenous, lymph node, and peritoneal recurrence in stage II/III gastric cancer patients enrolled in the ACTS-GC study. *Oncotarget.* 2017;8(34):57574-57582.
18. Sun C, Yuan Q, Wu D, Meng X, Wang B. Identification of core genes and outcome in gastric cancer using bioinformatics analysis. *Oncotarget.* 2017;8(41):70271-70280.
19. Du F, Feng W, Chen S, et al. Sex determining region Y-box 12 (SOX12) promotes gastric cancer metastasis by upregulating MMP7 and IGF1. *Cancer Lett.* 2019;452:103-118. doi:10.1016/j.canlet.2019.03.035
20. West AC, Tang K, Tye H, et al. Identification of a TLR2-regulated gene signature associated with tumor cell growth in gastric cancer. *Oncogene.* 2017;36(36):5134-5144. doi:10.1038/onc.2017.121
21. Li J, Ding Y, Li A. Identification of COL1A1 and COL1A2 as candidate prognostic factors in gastric cancer. *World J Surg Oncol.* 2016;14(1):297.
22. Ao R, Guan L, Wang Y, Wang JN. Silencing of COL1A2, COL6A3, and THBS2 inhibits gastric cancer cell proliferation, migration, and invasion while promoting apoptosis through the PI3k-Akt signaling pathway. *J Cell Biochem.* 2018;119(6):4420-4434.
23. Shen J, Zhai J, You Q, et al. Cancer-associated fibroblasts-derived VCAM1 induced by H. pylori infection facilitates tumor invasion in gastric cancer. *Oncogene.* 2020;39(14):2961-2974. doi:10.1038/s41388-020-1197-4
24. Liu X, Wu J, Zhang D, et al. Identification of Potential Key Genes Associated With the Pathogenesis and Prognosis of Gastric Cancer Based on Integrated Bioinformatics Analysis. *Front Genet.* 2018;9:265. Published 2018 Jul 17. doi:10.3389/fgene.2018.00265
25. Wang Q, Yu J. MiR-129-5p suppresses gastric cancer cell invasion and proliferation by inhibiting COL1A1. *Biochem Cell Biol.* 2018;96(1):19-25.
26. Boire A, Zou Y, Shieh J, Macalinao DG, Pentsova E, Massagué J. Complement Component 3 Adapts the Cerebrospinal Fluid for Leptomeningeal Metastasis. *Cell.* 2017;168(6):1101-1113.e13.
27. Zandi Z, Kashani B, Poursani EM, et al. TLR4 blockade using TAK-242 suppresses ovarian and breast cancer cells invasion through the inhibition of extracellular matrix degradation and epithelial-mesenchymal transition. *Eur J Pharmacol.* 2019;853:256-263.
28. Shao H, Ma L, Jin F, Zhou Y, Tao M, Teng Y. Immune inhibitory receptor LILRB2 is critical for the endometrial cancer progression. *Biochem Biophys Res Commun.* 2018;506(1):243-250.
29. Liu X, Yu X, Xie J, et al. ANGPTL2/LILRB2 signaling promotes the propagation of lung cancer cells. *Oncotarget.* 2015;6(25):21004-21015.
30. Li K, Du H, Lian X, et al. Establishment and characterization of a metastasis model of human gastric cancer in nude mice. *BMC Cancer.* 2016;16:54. Published 2016 Feb 3. doi:10.1186/s12885-016-2101-z
31. Liu X, Wu J, Zhang D, et al. Identification of Potential Key Genes Associated With the Pathogenesis and Prognosis of Gastric Cancer Based on Integrated Bioinformatics

Analysis. *Front Genet.* 2018;9:265. Published 2018 Jul 17. doi:10.3389/fgene.2018.00265

32. Choe EK, Yi JW, Chai YJ, Park KJ. Upregulation of the adipokine genes ADIPOR1 and SPP1 is related to poor survival outcomes in colorectal cancer. *J Surg Oncol.* 2018;117(8):1833-1840.
33. Ding D, Yao Y, Yang C, Zhang S. Identification of mannose receptor and CD163 as novel biomarkers for colorectal cancer. *Cancer Biomark.* 2018;21(3):689-700.
34. Shiraishi D, Fujiwara Y, Horlad H, et al. CD163 Is Required for Protumoral Activation of Macrophages in Human and Murine Sarcoma. *Cancer Res.* 2018;78(12):3255-3266.
35. Ren G, Tian Q, An Y, et al. Coronin 3 promotes gastric cancer metastasis via the up-regulation of MMP-9 and cathepsin K. *Mol Cancer.* 2012;11:67. Published 2012 Sep 14. doi:10.1186/1476-4598-11-67
36. Zhou H, Wu J, Wang T, Zhang X, Liu D. CXCL10/CXCR3 axis promotes the invasion of gastric cancer via PI3K/AKT pathway-dependent MMPs production. *Biomed Pharmacother.* 2016;82:479-488. doi:10.1016/j.biopha.2016.04.069
37. Cheng WL, Wang CS, Huang YH, Tsai MM, Liang Y, Lin KH. Overexpression of CXCL1 and its receptor CXCR2 promote tumor invasion in gastric cancer [published correction appears in *Ann Oncol.* 2011 Nov;22(11):2537]. *Ann Oncol.* 2011;22(10):2267-2276. doi:10.1093/annonc/mdq739
38. Tanabe S, Aoyagi K, Yokozaki H, Sasaki H. Regulated genes in mesenchymal stem cells and gastric cancer. *World J Stem Cells.* 2015;7(1):208-222.
39. Zhang Y, Lu N, Xue Y, et al. Expression of immunoglobulin-like transcript (ILT)2 and ILT3 in human gastric cancer and its clinical significance. *Mol Med Rep.* 2012;5(4):910-916. doi:10.3892/mmr.2012.744
40. Poh AR, Dwyer AR, Eissmann MF, et al. Inhibition of the SRC Kinase HCK Impairs STAT3-Dependent Gastric Tumor Growth in Mice. *Cancer Immunol Res.* 2020;8(4):428-435. doi:10.1158/2326-6066.CIR-19-0623
41. Fujimoto N, Kubo T, Inatomi H, et al. Polymorphisms of the androgen transporting gene SLCO2B1 may influence the castration resistance of prostate cancer and the racial differences in response to androgen deprivation. *Prostate Cancer Prostatic Dis.* 2013;16(4):336-340.
42. Ji X, Zhu H, Dai X, et al. Overexpression of GBP1 predicts poor prognosis and promotes tumor growth in human glioblastoma multiforme. *Cancer Biomark.* 2019;25(3):275-290.
43. Jingushi K, Uemura M, Nakano K, et al. Leukocyte-associated immunoglobulin-like receptor 1 promotes tumorigenesis in RCC. *Oncol Rep.* 2019;41(2):1293-1303. doi:10.3892/or.2018.6875.
44. Wang Y, Zhao E, Zhang Z, Zhao G, Cao H. Association between Tim-3 and Gal-9 expression and gastric cancer prognosis. *Oncol Rep.* 2018;40(4):2115-2126. doi:10.3892/or.2018.6627.
45. Cheng TY, Wu MS, Lin JT, et al. Annexin A1 is associated with gastric cancer survival and promotes gastric cancer cell invasiveness through the formyl peptide receptor/extracellular signal-regulated kinase/integrin beta-1-binding protein 1 pathway. *Cancer.* 2012;118(23):5757-5767. doi:10.1002/cncr.27565.
46. Li S, Xu W. Mining TCGA database for screening and identification of hub genes in kidney renal clear cell carcinoma microenvironment [published online ahead of print, 2019 Nov 7]. *J Cell Biochem.* 2019;10.1002/jcb.29511. doi:10.1002/jcb.29511
47. Zhang X, Wang W, Li P, Wang X, Ni K. High TREM2 expression correlates with poor prognosis in gastric cancer. *Hum Pathol.* 2018;72:91-99. doi:10.1016/j.humpath.2017.10.026
48. Tang W, Lv B, Yang B, et al. TREM2 acts as a tumor suppressor in hepatocellular carcinoma by targeting the PI3K/Akt/ $\beta$ -catenin pathway. *Oncogenesis.* 2019;8(2):9. Published 2019 Jan 25. doi:10.1038/s41389-018-0115-x.
49. Lehtinen L, Vainio P, Wikman H, et al. PLA2G7 associates with hormone receptor negativity in clinical breast cancer samples and regulates epithelial-mesenchymal transition

in cultured breast cancer cells. *J Pathol Clin Res*. 2017;3(2):123-138. Published 2017 Apr 4. doi:10.1002/cjp2.69

50. Yang CA, Huang HY, Chang YS, Lin CL, Lai IL, Chang JG. DNA-Sensing and Nuclease Gene Expressions as Markers for Colorectal Cancer Progression. *Oncology*. 2017;92(2):115-124. doi:10.1159/000452281
51. Pan X, Chen Y, Gao S. Four genes relevant to pathological grade and prognosis in ovarian cancer [published online ahead of print, 2020 May 13]. *Cancer Biomark*. 2020;10.3233/CBM-191162. doi:10.3233/CBM-191162
52. Rose AM, Krishan A, Chakarova CF, et al. MSR1 repeats modulate gene expression and affect risk of breast and prostate cancer. *Ann Oncol*. 2018;29(5):1292-1303. doi:10.1093/annonc/mdy082
53. Kanda M, Shimizu D, Sueoka S, et al. Prognostic relevance of SAMSN1 expression in gastric cancer. *Oncol Lett*. 2016;12(6):4708-4716. doi:10.3892/ol.2016.5233
54. Sueoka S, Kanda M, Sugimoto H, et al. Suppression of SAMSN1 Expression is Associated with the Malignant Phenotype of Hepatocellular Carcinoma. *Ann Surg Oncol*. 2015;22 Suppl 3:S1453-S1460. doi:10.1245/s10434-015-4524-1
55. Koide N, Kasamatsu A, Endo-Sakamoto Y, et al. Evidence for Critical Role of Lymphocyte Cytosolic Protein 1 in Oral Cancer. *Sci Rep*. 2017;7:43379. Published 2017 Feb 23. doi:10.1038/srep43379
56. Li Y, Shen Z, Wang B, et al. Long non-coding RNA GPR65-1 is up-regulated in gastric cancer and promotes tumor growth through the PTEN-AKT-slug signaling pathway. *Cell Cycle*. 2018;17(6):759-765. doi:10.1080/15384101.2018.1426414
57. Jia Z, Zhang Z, Yang Q, Deng C, Li D, Ren L. Effect of IL2RA and IL2RB gene polymorphisms on lung cancer risk. *Int Immunopharmacol*. 2019;74:105716. doi:10.1016/j.intimp.2019.105716

**Table S8** Association of hub genes in PPI and WGCNA networks with overall survival in  
TCGA-STAD

|                                           | mRNA expression |      | HR    | 95% CI |       | <i>P</i> |
|-------------------------------------------|-----------------|------|-------|--------|-------|----------|
|                                           | Low             | High |       | Bottom | Top   |          |
| Common hub genes in PPI and WGCNA network |                 |      |       |        |       |          |
| <i>TYROBP</i>                             | 160             | 207  | 1.456 | 1.038  | 2.042 | 0.029    |
| <i>CIQB</i>                               | 146             | 221  | 1.475 | 1.037  | 2.098 | 0.030    |
| <i>PTPRC</i>                              | 256             | 111  | 1.301 | 0.923  | 1.832 | 0.132    |
| <i>LCP2</i>                               | 217             | 150  | 1.272 | 0.917  | 1.764 | 0.148    |
| <i>CYBB</i>                               | 113             | 254  | 1.287 | 0.882  | 1.877 | 0.189    |
| <i>CCR1</i>                               | 226             | 141  | 1.148 | 0.825  | 1.598 | 0.412    |
| Other hub genes in PPI network            |                 |      |       |        |       |          |
| <i>LOX</i>                                | 221             | 146  | 1.716 | 1.234  | 2.385 | 0.001    |
| <i>COL3A1</i>                             | 270             | 97   | 1.739 | 1.233  | 2.454 | 0.001    |
| <i>FN1</i>                                | 249             | 118  | 1.706 | 1.224  | 2.377 | 0.001    |
| <i>FBN1</i>                               | 262             | 105  | 1.687 | 1.204  | 2.365 | 0.002    |
| <i>CXCR4</i>                              | 207             | 160  | 1.649 | 1.190  | 2.287 | 0.002    |
| <i>PECAM1</i>                             | 275             | 92   | 1.613 | 1.136  | 2.289 | 0.007    |
| <i>BGN</i>                                | 103             | 264  | 1.716 | 1.141  | 2.580 | 0.009    |
| <i>IGF1</i>                               | 246             | 121  | 1.486 | 1.066  | 2.072 | 0.019    |
| <i>TLR2</i>                               | 97              | 270  | 1.645 | 1.060  | 2.553 | 0.025    |
| <i>COL1A2</i>                             | 268             | 99   | 1.483 | 1.043  | 2.109 | 0.027    |
| <i>VCAM1</i>                              | 117             | 250  | 1.527 | 1.031  | 2.263 | 0.033    |
| <i>COL1A1</i>                             | 93              | 274  | 1.531 | 1.006  | 2.328 | 0.045    |
| <i>SELL</i>                               | 100             | 267  | 1.499 | 0.997  | 2.253 | 0.050    |
| <i>C3</i>                                 | 256             | 111  | 1.397 | 0.997  | 1.957 | 0.051    |
| <i>TLR4</i>                               | 242             | 125  | 1.372 | 0.985  | 1.912 | 0.060    |
| <i>LILRB2</i>                             | 135             | 232  | 1.394 | 0.975  | 1.993 | 0.067    |
| <i>ICAM1</i>                              | 152             | 215  | 1.365 | 0.968  | 1.927 | 0.075    |
| <i>TIMP1</i>                              | 275             | 92   | 1.361 | 0.954  | 1.942 | 0.087    |
| <i>SPP1</i>                               | 201             | 166  | 1.279 | 0.922  | 1.774 | 0.140    |
| <i>CD163</i>                              | 263             | 104  | 1.235 | 0.874  | 1.745 | 0.230    |

|                                  |     |     |       |       |       |        |
|----------------------------------|-----|-----|-------|-------|-------|--------|
| <i>MMP9</i>                      | 185 | 182 | 1.200 | 0.863 | 1.668 | 0.278  |
| <i>CXCL10</i>                    | 118 | 249 | 1.208 | 0.839 | 1.739 | 0.309  |
| <i>PLEK</i>                      | 170 | 197 | 1.105 | 0.794 | 1.539 | 0.553  |
| <i>CXCL1</i>                     | 264 | 103 | 1.073 | 0.756 | 1.523 | 0.693  |
| Other hub genes in WGCNA network |     |     |       |       |       |        |
| <i>RGS1</i>                      | 249 | 118 | 1.806 | 1.297 | 2.514 | <0.001 |
| <i>CLEC7A</i>                    | 92  | 275 | 1.599 | 1.052 | 2.429 | 0.027  |
| <i>LILRB4</i>                    | 118 | 249 | 1.522 | 1.044 | 2.218 | 0.028  |
| <i>HCK</i>                       | 99  | 268 | 1.491 | 0.997 | 2.228 | 0.049  |
| <i>SLCO2B1</i>                   | 209 | 158 | 1.353 | 0.977 | 1.875 | 0.068  |
| <i>CIQC</i>                      | 128 | 239 | 1.364 | 0.950 | 1.958 | 0.091  |
| <i>GBP1</i>                      | 113 | 254 | 1.378 | 0.938 | 2.026 | 0.101  |
| <i>LAIR1</i>                     | 98  | 269 | 1.385 | 0.931 | 2.061 | 0.106  |
| <i>HAVCR2</i>                    | 102 | 265 | 1.371 | 0.930 | 2.022 | 0.109  |
| <i>FPR3</i>                      | 235 | 132 | 1.294 | 0.929 | 1.803 | 0.127  |
| <i>TNFSF13B</i>                  | 104 | 263 | 1.333 | 0.911 | 1.950 | 0.138  |
| <i>TREM2</i>                     | 156 | 211 | 1.279 | 0.912 | 1.793 | 0.153  |
| <i>PLA2G7</i>                    | 114 | 253 | 1.303 | 0.903 | 1.881 | 0.156  |
| <i>SIGLEC7</i>                   | 253 | 114 | 1.276 | 0.909 | 1.790 | 0.158  |
| <i>TM6SF1</i>                    | 234 | 133 | 1.265 | 0.909 | 1.761 | 0.162  |
| <i>IFI16</i>                     | 236 | 131 | 1.256 | 0.900 | 1.751 | 0.179  |
| <i>MS4A6A</i>                    | 229 | 138 | 1.251 | 0.898 | 1.741 | 0.184  |
| <i>CD53</i>                      | 264 | 103 | 1.264 | 0.892 | 1.790 | 0.187  |
| <i>MSR1</i>                      | 124 | 243 | 1.259 | 0.879 | 1.803 | 0.208  |
| <i>SAMSN1</i>                    | 133 | 234 | 1.235 | 0.864 | 1.766 | 0.245  |
| <i>LCPI</i>                      | 191 | 176 | 1.192 | 0.860 | 1.652 | 0.290  |
| <i>GPR65</i>                     | 260 | 107 | 1.205 | 0.850 | 1.706 | 0.294  |
| <i>SLA</i>                       | 151 | 216 | 1.158 | 0.823 | 1.630 | 0.400  |
| <i>IL2RA</i>                     | 130 | 237 | 1.158 | 0.813 | 1.651 | 0.415  |

**Table S9** Correlation between key genes and immune factors in TCGA-STAD

| Immune factors               | <i>TYROBP</i> |        | <i>CIQB</i> |        |
|------------------------------|---------------|--------|-------------|--------|
|                              | R             | P      | R           | P      |
| B cells naive                | -0.27         | <0.001 | -0.24       | <0.001 |
| B cells memory               | -0.18         | 0.005  | -0.22       | 0.001  |
| Plasma cells                 | -0.19         | 0.004  | -0.15       | 0.026  |
| T cells CD8                  | 0.21          | <0.001 | 0.26        | <0.001 |
| T cells CD4 naive            | -0.10         | 0.121  | -0.10       | 0.114  |
| T cells CD4 memory resting   | -0.27         | <0.001 | -0.25       | <0.001 |
| T cells CD4 memory activated | 0.26          | <0.001 | 0.37        | <0.001 |
| T cells follicular helper    | 0.01          | 0.887  | 0.11        | 0.057  |
| T cells regulatory           | 0.01          | 0.758  | -0.09       | 0.146  |
| T cells gamma delta          | 0.15          | <0.001 | 0.22        | <0.001 |
| NK cells resting             | 0.01          | 0.044  | 0.01        | 0.054  |
| NK cells activated           | -0.04         | 0.862  | -0.05       | 0.690  |
| Monocyte                     | 0.06          | 0.364  | -0.02       | 0.770  |
| Macrophages M0               | 0.00          | 0.945  | -0.05       | 0.421  |
| Macrophages M1               | 0.23          | <0.001 | 0.36        | <0.001 |
| Macrophages M2               | 0.46          | <0.001 | 0.47        | <0.001 |
| Dendritic cells resting      | 0.20          | 0.001  | 0.23        | <0.001 |
| Dendritic cells activated    | -0.22         | 0.025  | -0.29       | 0.001  |
| Mast cells resting           | -0.01         | 0.843  | -0.01       | 0.886  |
| Mast cells activated         | -0.10         | 0.144  | -0.16       | 0.014  |
| Eosinophils                  | 0.15          | <0.001 | 0.11        | <0.001 |
| Neutrophils                  | 0.14          | 0.004  | 0.03        | 0.175  |
| GZMA                         | -0.25         | <0.001 | -0.24       | <0.001 |
| PRF1                         | -0.33         | <0.001 | -0.32       | <0.001 |
| Cytolytic activity           | -0.30         | <0.001 | -0.28       | <0.001 |
| CD274                        | 0.49          | <0.001 | 0.61        | <0.001 |
| PDCD1                        | 0.55          | <0.001 | 0.65        | <0.001 |
| PDCD1LG2                     | 0.72          | <0.001 | 0.80        | <0.001 |
| LAG3                         | 0.59          | <0.001 | 0.70        | <0.001 |

**Table S10** Univariable and multivariable Cox regression for *TYROBP*, *CIQB* and macrophages

| Model                     | Variables      | HR    | 95%CI  |       | <i>P</i> |
|---------------------------|----------------|-------|--------|-------|----------|
|                           |                |       | Bottom | top   |          |
| Univariable Cox model     | <i>TYROBP</i>  | 1.455 | 1.038  | 2.041 | 0.029    |
|                           | <i>CIQB</i>    | 1.474 | 1.037  | 2.097 | 0.030    |
|                           | macrophages M1 | 1.182 | 0.817  | 1.712 | 0.374    |
|                           | macrophages M2 | 1.494 | 1.055  | 2.116 | 0.024    |
| Multivariable Cox model 1 | <i>TYROBP</i>  | 1.518 | 1.060  | 2.174 | 0.023    |
|                           | macrophages M1 | 1.054 | 0.719  | 1.545 | 0.786    |
| Multivariable Cox model 2 | <i>CIQB</i>    | 1.550 | 1.059  | 2.268 | 0.024    |
|                           | macrophages M1 | 1.033 | 0.702  | 1.520 | 0.869    |
| Multivariable Cox model 3 | <i>TYROBP</i>  | 1.399 | 0.970  | 2.018 | 0.073    |
|                           | macrophages M2 | 1.340 | 0.929  | 1.933 | 0.118    |
| Multivariable Cox model 4 | <i>CIQB</i>    | 1.428 | 0.976  | 2.088 | 0.067    |
|                           | macrophages M2 | 1.349 | 0.939  | 1.94  | 0.106    |
